# Supplementary material for: Electronic Health Records, Interoperability and Patient Safety in Health Systems of High-income Countries: A Systematic Review Protocol
Source: PubMed Central journal article supplement (PMC8280868; doi:10.1136/bmjopen-2020-044941), 2021-07-14
Supplement: bmjopen-2020-044941.draft_revisions.pdf [file bmjopen-2020-044941.draft_revisions.pdf]

# BMJ Open

BMJ Open is committed to open peer review. As part of this commitment we make the peer review history of every article we publish publicly available.

When an article is published we post the peer reviewers' comments and the authors' responses online. We also post the versions of the paper that were used during peer review. These are the versions that the peer review comments apply to.

The versions of the paper that follow are the versions that were submitted during the peer review process. They are not the versions of record or the final published versions. They should not be cited or distributed as the published version of this manuscript.

BMJ Open is an open access journal and the full, final, typeset and author-corrected version of record of the manuscript is available on our site with no access controls, subscription charges or pay-per-view fees (<http://bmjopen.bmj.com>).

If you have any questions on BMJ Open's open peer review process please email [info.bmjopen@bmj.com](mailto:info.bmjopen@bmj.com)

# BMJ Open

## Electronic Health Records, Interoperability, and Patient Safety in Health Systems of High-Income Countries: A Systematic Review Protocol

|                               |                                                                                                                                                                                                                                                                                                                                                                                                                                                                                                                                                                                                                                                                                                                                                                                                                                                                                                                                                                                                                                                                                                                                                                                                                       |
|-------------------------------|-----------------------------------------------------------------------------------------------------------------------------------------------------------------------------------------------------------------------------------------------------------------------------------------------------------------------------------------------------------------------------------------------------------------------------------------------------------------------------------------------------------------------------------------------------------------------------------------------------------------------------------------------------------------------------------------------------------------------------------------------------------------------------------------------------------------------------------------------------------------------------------------------------------------------------------------------------------------------------------------------------------------------------------------------------------------------------------------------------------------------------------------------------------------------------------------------------------------------|
| Journal:                      | <i>BMJ Open</i>                                                                                                                                                                                                                                                                                                                                                                                                                                                                                                                                                                                                                                                                                                                                                                                                                                                                                                                                                                                                                                                                                                                                                                                                       |
| Manuscript ID                 | bmjopen-2020-044941                                                                                                                                                                                                                                                                                                                                                                                                                                                                                                                                                                                                                                                                                                                                                                                                                                                                                                                                                                                                                                                                                                                                                                                                   |
| Article Type:                 | Protocol                                                                                                                                                                                                                                                                                                                                                                                                                                                                                                                                                                                                                                                                                                                                                                                                                                                                                                                                                                                                                                                                                                                                                                                                              |
| Date Submitted by the Author: | 19-Sep-2020                                                                                                                                                                                                                                                                                                                                                                                                                                                                                                                                                                                                                                                                                                                                                                                                                                                                                                                                                                                                                                                                                                                                                                                                           |
| Complete List of Authors:     | <p>Li, Edmond; Imperial College London, Patient Safety Translational Research Centre, Institute of Global Health Innovation, Department of Surgery &amp; Cancer; London School of Hygiene and Tropical Medicine Faculty of Infectious and Tropical Diseases, Clinical Research Department</p> <p>Neves, Ana Luisa; Imperial College London, Patient Safety Translational Research Centre, Institute of Global Health Innovation, Department of Surgery &amp; Cancer; University of Porto, Center for Health Technology and Services Research / Department of Community Medicine, Health Information and Decision</p> <p>Clarke, Jonathan; Imperial College London, Patient Safety Translational Research Centre, Institute of Global Health Innovation, Department of Surgery &amp; Cancer; Imperial College London, Centre for Mathematics of Precision Healthcare</p> <p>Ashrafian, Hutan; Imperial College London, Patient Safety Translational Research Centre, Institute of Global Health Innovation, Department of Surgery &amp; Cancer</p> <p>Darzi, Ara; Imperial College London, Patient Safety Translational Research Centre, Institute of Global Health Innovation, Department of Surgery &amp; Cancer</p> |
| Keywords:                     | <p>Health informatics &lt; BIOTECHNOLOGY &amp; BIOINFORMATICS, Telemedicine &lt; BIOTECHNOLOGY &amp; BIOINFORMATICS, Information technology &lt; BIOTECHNOLOGY &amp; BIOINFORMATICS, Information management &lt; BIOTECHNOLOGY &amp; BIOINFORMATICS, HEALTH SERVICES ADMINISTRATION &amp; MANAGEMENT, Health policy &lt; HEALTH SERVICES ADMINISTRATION &amp; MANAGEMENT</p>                                                                                                                                                                                                                                                                                                                                                                                                                                                                                                                                                                                                                                                                                                                                                                                                                                          |
|                               |                                                                                                                                                                                                                                                                                                                                                                                                                                                                                                                                                                                                                                                                                                                                                                                                                                                                                                                                                                                                                                                                                                                                                                                                                       |

SCHOLARONE™  
Manuscripts

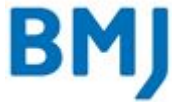

I, the Submitting Author has the right to grant and does grant on behalf of all authors of the Work (as defined in the below author licence), an exclusive licence and/or a non-exclusive licence for contributions from authors who are: i) UK Crown employees; ii) where BMJ has agreed a CC-BY licence shall apply, and/or iii) in accordance with the terms applicable for US Federal Government officers or employees acting as part of their official duties; on a worldwide, perpetual, irrevocable, royalty-free basis to BMJ Publishing Group Ltd ("BMJ") its licensees and where the relevant Journal is co-owned by BMJ to the co-owners of the Journal, to publish the Work in this journal and any other BMJ products and to exploit all rights, as set out in our [licence](#).

The Submitting Author accepts and understands that any supply made under these terms is made by BMJ to the Submitting Author unless you are acting as an employee on behalf of your employer or a postgraduate student of an affiliated institution which is paying any applicable article publishing charge ("APC") for Open Access articles. Where the Submitting Author wishes to make the Work available on an Open Access basis (and intends to pay the relevant APC), the terms of reuse of such Open Access shall be governed by a Creative Commons licence – details of these licences and which [Creative Commons](#) licence will apply to this Work are set out in our licence referred to above.

Other than as permitted in any relevant BMJ Author's Self Archiving Policies, I confirm this Work has not been accepted for publication elsewhere, is not being considered for publication elsewhere and does not duplicate material already published. I confirm all authors consent to publication of this Work and authorise the granting of this licence.

# Electronic Health Records, Interoperability, and Patient Safety in Health Systems of High-Income Countries: A Systematic Review Protocol

Edmond Li<sup>[1]</sup>, Ana Luisa Neves<sup>[1,2]</sup>, Jonathan Clarke<sup>[1,3]</sup>, Hutan Ashrafian<sup>[1]</sup>, Ara Darzi<sup>[1]</sup>

<sup>[1]</sup> Imperial NIHR Patient Safety Translational Research Centre (PSTRC), Institute of Global Health Innovation (IGHI), Imperial College London, London, United Kingdom

<sup>[2]</sup> Department of Community Medicine, Information and Health Decision Sciences (MEDCIDS) / Center for Health Technology and Services Research (CINTESIS), University of Porto, Porto, Portugal.

<sup>[3]</sup> Centre for Mathematics of Precision Healthcare, Imperial College London, London, United Kingdom

## Corresponding author

Name: Edmond Li

Email: [edmond.li19@imperial.ac.uk](mailto:edmond.li19@imperial.ac.uk)

Address: Institute of Global Health Innovation, Room 1035/7, QEQM Wing, St Mary's Campus, London W2 1NY

**Keywords [MeSH terms]:** electronic health records, electronic medical records, computerised patient records, health information technology, health information exchanges, interoperability, patient safety, patient harm, adverse events, health outcomes

**Word count:** 1821

**Target journal:** BMJ Open

## Abstract

### Introduction

The availability and routine use of electronic health records (EHRs) have become commonplace in healthcare systems of many high-income countries. While there is an ever-growing body of literature pertaining to EHR use, evidence surrounding the importance of EHR interoperability and its impact on patient safety remains less clear. There is therefore a need and opportunity to evaluate the evidence available regarding this relationship so as to better inform health informatics development and policies in the years to come.

### Objective

This systematic review aims to evaluate the impact of EHR interoperability on patient safety in health systems of high-income countries.

### Methods and analysis

A systematic literature review will be conducted via a computerised search through three databases: PubMed, Embase, and HMIC for relevant articles published between March 2010 and March 2020. Outcomes of interest will include: impact on patient safety, and the broader effects on health systems. Quality of the randomised quantitative studies will be assessed using Cochrane Risk of Bias Tool. Non-randomised papers will be evaluated with the Risk of Bias In Non-Randomised Studies - of Interventions (ROBINS-I) tool. Drummond's Checklist will be utilised for publications pertaining to economic evaluation. The National Institute for Health and Care Excellence (NICE) quality appraisal checklist will be used to assess qualitative studies. A narrative synthesis will be conducted for included studies, and the body of evidence will be summarised in a summary of findings table.

### Ethics and dissemination

This review will summarise published studies with non-identifiable data and therefore does not require ethical approval. This protocol complies with the Preferred Reporting Items for Systematic Review and Meta-Analyses Protocols guidelines. Findings will be disseminated through preprints, open access peer-reviewed publication, and conference presentations. Patients or members of the public were not involved in the design of this study.

### Strengths and limitations of this study

| Strengths                                                                                                                                                                                                                                                                                                                                                                                                                                      | Limitations                                                                                                                                                                                                                                                                                                                                       |
|------------------------------------------------------------------------------------------------------------------------------------------------------------------------------------------------------------------------------------------------------------------------------------------------------------------------------------------------------------------------------------------------------------------------------------------------|---------------------------------------------------------------------------------------------------------------------------------------------------------------------------------------------------------------------------------------------------------------------------------------------------------------------------------------------------|
| <ul style="list-style-type: none"> <li>• Comprehensive characterisation of interventions using interoperable EHRs</li> <li>• Summary and quality appraisal of existing evidence on the potential impact on patient safety</li> <li>• Inclusion of both quantitative and qualitative methods can provide a comprehensive overview of the multitude of ways in which interoperable EHRs may affect patient safety and health systems.</li> </ul> | <ul style="list-style-type: none"> <li>• The heterogeneity of methods and outcomes assessed may obscure the true effect interoperable EHRs have had on patient safety in the clinical setting</li> <li>• Potential small sample size in subgroup analyses, may negatively impact the statistical power in quantitative data synthesis.</li> </ul> |

- |                                                                                                                                                                                                    |  |
|----------------------------------------------------------------------------------------------------------------------------------------------------------------------------------------------------|--|
| <ul style="list-style-type: none"><li>• The proposed review attempts to answer a pragmatic question which is integral to influencing future health informatics development and policies.</li></ul> |  |
|----------------------------------------------------------------------------------------------------------------------------------------------------------------------------------------------------|--|

PROSPERO registration number [CRD42020209285]

This is an open access article distributed in accordance with the Creative Commons Attribution 4.0 Unported (CC BY 4.0) license, which permits others to copy, redistribute, remix, transform and build upon this work for any purpose, provided the original work is properly cited, a link to the licence is given, and indication of whether changes were made. See: <https://creativecommons.org/licenses/by/4.0/>.

For peer review only

## Introduction

Electronic health records (EHRs) have become an integral part of modern healthcare since their initial mainstream implementation in the mid-late 2000s through the passing of the Health Information Technology for Economic and Clinical Health Act (HITECH) in the United States and the NHS National Programme for IT initiative (NPfIT) in England (1–4). From the documentation & retrieval of patient records and the prescription of medications, to coordinating complex care plans between different healthcare providers and electronic billing, EHRs fulfil a multitude of roles for both clinicians and patients alike (5–9).

In order to achieve EHR's full potential, it is critical to improve interoperability - i.e. “*the ability of health information systems to work together within and across organisation boundaries in order to advance effective delivery of healthcare for individuals and communities*” (10). The lack of universal interoperability is often cited as one of the many significant shortcomings of EHRs currently in use, resulting in duplication in healthcare costs, increased clinician workload fatigue, and poses a potential risk to patient safety (2). This is especially problematic for patient populations with chronic conditions, polypharmacy, and multiple comorbidities who are reliant upon effective patient information sharing via EHRs to facilitate their care (11).

In the fragmented EHR landscape of the United Kingdom, understanding this poor interoperability and accurately measuring its cost both to patient safety and the health system as a whole, remain challenging (12). Although there is a growing body of literature investigating areas such as the facilitators and barriers to EHR greater adoption, technical capabilities, and usability (13,14), no systematic review has been conducted exploring specifically the problem of interoperability amongst the assortment of EHRs in use, how it affects patient safety, and ultimately the financial cost savings lost to health systems.

In a recent systematic review by Dobrow *et al.* assessing the effects of EHR and HIT interoperability on health systems, 130 publications were included, with the majority being studies conducted in the United States, utilised quantitative methods, and focussed primarily in acute healthcare settings. The authors noted the use of interoperable EHRs had a positive impact on outcomes measures such as quality of care and productivity (13). However, in domains such as stakeholder engagement, performance & reliability, security & privacy, information quality, and ease of use, the benefits of interoperable EHRs was less clear (13). Amongst the 130 publications, 17 were reviews with the majority directed at exploring facilitators & barriers to EHR implementation, and the general benefits and impact of EHR use. While this review did focus on studies pertaining to the topic of interoperable EHRs, this was done so only from a broad perspective and included studies exploring a wide range of outcomes related to the effects of EHR on healthcare rather than specifically on their implications to patient safety.

In another review by Hersh *et al.*, the authors explored how health information exchange (HIE) affected health systems on a variety of domains, including costs, healthcare utilisation, health outcomes, healthcare worker attitudes, and sustainability. Despite the widespread routinely use of HIE, the authors described a general lack of robust evidence on the quality, costs, efficiency, usage, and sustainability (15). However, there was some evidence demonstrating HIEs being

associated with reduced utilisation and costs in emergency care settings despite methodological issues being present in many of the included publications (15). Although this review was ambitious in the wide scope of interest regarding the effects of HIE use, patient safety was not a primary topic of focus. Another limitation of this study was that it only contained US-based publications, and thus findings lack generalisability internationally to other health systems in high-income countries (HIC) which are both organised, financed differently.

## Research aim

The overall aim of this literature review is to explore how EHR interoperability impacts patient safety, in the context of health systems in HICs. The results generated will aim to inform healthcare policymakers and help shape more effective EHR system implementation and modernisation efforts in the coming years.

## Methods and analysis

### Search strategy

A computerised search of the literature published in the last 10 years (March 2010 to March 2020) search will be performed on PubMed, Embase and Health Management Information Consortium (HMIC). The list of search strings used will include both free text and controlled terms, whenever supported (Table 1) and will be iteratively refined in consultation with the Imperial College St. Mary's campus medical librarian.

Grey literature sources will also be searched, including registrations in the International Prospective Register of Systematic Reviews, reports of relevant stakeholder organisations (NHS England, American Medical Informatics Association (AMIA), eHealth at WHO, and conference proceedings (last 5 years) of several related conferences (AMIA, MedInfo, Medicine 2.0, Medicine X)), in order to identify possible additional studies that meet the inclusion criteria.

The search has also been restricted to HIC and articles published in English only.

Table 1: Concepts and database search terms

| Electronic health records                                                                                                                                                                                                                                      |            | Interoperability                                                                                                                  |            | Patient safety                                                                                                                                                                                                               |
|----------------------------------------------------------------------------------------------------------------------------------------------------------------------------------------------------------------------------------------------------------------|------------|-----------------------------------------------------------------------------------------------------------------------------------|------------|------------------------------------------------------------------------------------------------------------------------------------------------------------------------------------------------------------------------------|
| <ul style="list-style-type: none"> <li>● Electronic health record* / EHR</li> <li>● Electronic medical record* / EMR</li> <li>● Health information exchange / HIE</li> <li>● Health information technology / HIT</li> <li>● EHR-based interventions</li> </ul> | <b>AND</b> | <ul style="list-style-type: none"> <li>● Interoperabl*</li> <li>● Interoperability</li> <li>● Standards of information</li> </ul> | <b>AND</b> | <ul style="list-style-type: none"> <li>● Patient safety</li> <li>● Patient adj1 incident*</li> <li>● Adverse adj1 event*</li> <li>● Patient adj1 outcome*</li> <li>● Patient adj1 harm</li> <li>● Risk management</li> </ul> |



|                                      |  |  |  |  |
|--------------------------------------|--|--|--|--|
| • Computerised patient record* / CPR |  |  |  |  |
|--------------------------------------|--|--|--|--|

### Study selection criteria

A summary of the population, intervention, comparison, outcomes, and type of studies being considered is provided in **Table 2**. This systematic review will focus on studies performed in high-income countries and published in English only. Studies assessing the impact of EHR interoperability will be included. Interventions will include EHR systems interoperable with other health information technology systems both within and across healthcare facilities, as well as those used in tertiary and community settings. The primary outcomes to be considered in this review will be safety outcomes, including adverse events/incidents, safety-related patient experiences, and health outcomes. In addition, secondary outcomes would include studies exploring the broader impact of interoperable EHRs on health systems such as cost effectiveness and clinical culture amongst healthcare providers on the topic. Both qualitative and quantitative studies will be included. Reference lists of the selected articles will also be screened for papers which may have been missed by the initial database search but still meet the eligibility criteria.

Table 2: PICO inclusion criteria

|                     |                                                           |
|---------------------|-----------------------------------------------------------|
| <i>Population</i>   | High-income countries utilising electronic health records |
| <i>Intervention</i> | EHRs with interoperability                                |
| <i>Comparison</i>   | Usual care (i.e. existing baseline of interoperability)   |
| <i>Outcome</i>      | Impact on patient safety and quality of care              |

### Screening

Articles to be included will be screened by two independent reviewers, following the process described in the Preferred Reporting Items for Systematic Reviews and Meta-Analyses (PRISMA) flow diagram (16). The initial screening will be done by the first reviewer based on the publication titles, followed by a second screening based on the abstracts. Included abstracts will then be fully reviewed by two independent researchers to produce a unified selection of articles to be included in this review. Cohen's kappa will be calculated to ensure inter-rater agreement and consistency in the selection of studies to be included (17,18). Any disagreements will be resolved by consensus; if a Cohen's kappa value of less than 0.6 is reported, the discrepancies will be addressed through discussions with a more experienced third investigator.

### Data extraction & analysis

Data extraction will be performed using a standardised extraction table for each of the two investigators to summarise the characteristics and findings of each included study, including name of the first author, year of publication, study design, number of participants, retention rates, setting characteristics, outcome measures, and main results. The content of the two summary tables will then be aggregated and reviewed once more by both investigators, with any disagreements being solved by the third senior investigator.

### Quality assessment

The quality of randomised controlled trials and cluster randomised trials will be assessed using the Cochrane Risk of Bias Tool (19), and the quality of non-randomised intervention studies (i.e., case control, cohort, quasi-experimental) will be appraised using the 'Risk of Bias In Non-

1  
2  
3 Randomised Studies - of Interventions' (ROBINS-I) tool (20). For cost-effectiveness studies, the  
4 Drummond's checklist for assessing economic evaluations will be used (21). The National  
5 Institute for Health and Care Excellence (NICE) quality appraisal checklist will be utilised to  
6 assess the selected qualitative studies (22). Two independent reviewers will score the selected  
7 studies and any disagreements will be resolved by a third person. A risk of bias table along with  
8 an overall, collective bias narrative will be produced to summarise the biases of outcomes  
9 observed amongst the evaluated studies.  
10

### 11 Descriptive analysis

12 A narrative synthesis will be conducted for all the included studies.

13 Quantitative studies with comparable outcome measures will be aggregated to allow for  
14 comparative analyses whenever possible. However, no meta-analysis will be done for this  
15 systematic review as the likely heterogeneity of the outcomes would make this impractical.  
16 Qualitative studies will be thematically analysed. Those that demonstrate related, prominent  
17 themes in their findings will be grouped together and collectively summarised via a thematic  
18 narrative. The body of evidence will be summarised in two separate Summary of Findings tables  
19 (for both qualitative and quantitative studies) in accordance to the 'Grading of Recommendations  
20 Assessment, Development and Evaluation' (GRADE) criteria where possible (23).  
21

### 22 Patient and public involvement

23 This systematic literature review saw no direct participation by patients or the public during the  
24 design of this study. However, this study was designed following a series of structured  
25 interviews with patients regarding their experience of attending multiple institutions for hospital  
26 care (24). As this literature review will be used to form the basis for subsequent studies exploring  
27 the topic including ones involving patients, findings from this review will be shared with patient  
28 research groups to gain feedback and encourage further discourse surrounding the topic of EHR  
29 interoperability and patient safety.  
30  
31

### 32 Amendments

33 Any amendments to this protocol will be documented with reference to saved searches and  
34 analysis methods, which will be recorded in bibliographic databases, Mendeley and Excel  
35 templates for data collection and synthesis.  
36  
37  
38

### 39 Discussion

40 One of the primary strengths stemming from the almost exploratory nature of this systematic  
41 review is the ability to generate a succinct, comprehensive appraisal of the best evidence  
42 currently available regarding how EHR interoperability impacts patient care and safety. By  
43 publishing this review protocol beforehand, we demonstrate a clear, robust, and transparent  
44 approach to aggregating the anticipated assortment of literature on the subject in question.  
45 There are also some potential limitations to be acknowledged. A potential challenge would be  
46 the likely anticipated heterogeneity in methodology of the included articles. With such diverse  
47 means of measuring and assessing the effects of EHR interoperability, this will likely make  
48 comparisons between studies difficult and may obscure the true measure of effect EHR  
49 interoperability has had in the clinical setting. To mitigate this risk, outcomes will be grouped  
50 whenever possible, and summarised as a narrative synthesis. However, this can also represent a  
51 strength as it will provide a comprehensive overview on the subject, capitalising on various  
52 research methodologies, and providing novel insights on the impact of interoperable EHR  
53 systems on patient safety.  
54  
55  
56  
57  
58  
59  
60

## Acknowledgments

We would like to thank Michael Gainsford (Library Manager and Liaison Librarian at Imperial College London) for his support and guidance provided to improve the composition of the search terms and procedural aspects of the overall search strategy. JC acknowledges support from the Wellcome Trust [215938/Z/19/Z].

## Funding

This research was supported through the Imperial College National Institute for Health Research (NIHR) Patient Safety Translational Research Centre (PSTRC) and the Imperial College Biomedical Research Centre (BRC). However, the funder/sponsor has had no role in development and drafting of this protocol.

For peer review only

## References

1. Colicchio TK, Cimino JJ, Del Fiol G. Unintended consequences of nationwide electronic health record adoption: Challenges and opportunities in the post-meaningful use era. *Journal of Medical Internet Research*. [Online] 2019;21(6): 1–9. Available from: doi:10.2196/13313
2. Roman LC, Ancker JS, Johnson SB, Senathirajah Y. Navigation in the electronic health record: A review of the safety and usability literature. *Journal of Biomedical Informatics*. [Online] Elsevier Inc.; 2017;67: 69–79. Available from: doi:10.1016/j.jbi.2017.01.005
3. Justinia T. The UK's National Programme for IT: Why was it dismantled? *Health Services Management Research*. [Online] 2017;30(1): 2–9. Available from: doi:10.1177/0951484816662492
4. Wachter RM. Making IT work : harnessing the power of health IT to improve care in England. *National Advisory Group on Health Information Technology in England*. [Online] 2016; 71. Available from: [https://www.gov.uk/government/uploads/system/uploads/attachment\\_data/file/550866/Wachter\\_Review\\_Accessible.pdf](https://www.gov.uk/government/uploads/system/uploads/attachment_data/file/550866/Wachter_Review_Accessible.pdf)  
[https://assets.publishing.service.gov.uk/government/uploads/system/uploads/attachment\\_data/file/550866/Wachter\\_Review\\_Accessible.pdf](https://assets.publishing.service.gov.uk/government/uploads/system/uploads/attachment_data/file/550866/Wachter_Review_Accessible.pdf)
5. Kruse CS, Kristof C, Jones B, Mitchell E, Martinez A. Barriers to Electronic Health Record Adoption: a Systematic Literature Review. *Journal of Medical Systems*. [Online] *Journal of Medical Systems*; 2016;40(12). Available from: doi:10.1007/s10916-016-0628-9
6. Ayaad O, Alloubani A, ALhajaa EA, Farhan M, Abuseif S, Al Hroub A, et al. The role of electronic medical records in improving the quality of health care services: Comparative study. *International Journal of Medical Informatics*. [Online] Elsevier; 2019;127(April): 63–67. Available from: doi:10.1016/j.ijmedinf.2019.04.014
7. Evans RS. Electronic Health Records: Then, Now, and in the Future. *Yearbook of Medical Informatics*. [Online] 2016;25(S 01): S48–S61. Available from: doi:10.15265/IYS-2016-s006
8. Gagnon MP, Payne-Gagnon J, Breton E, Fortin JP, Khoury L, Dolovich L, et al. Adoption of electronic personal health records in Canada: Perceptions of stakeholders. *International Journal of Health Policy and Management*. [Online] 2016;5(7): 425–433. Available from: doi:10.15171/ijhpm.2016.36
9. Campanella P, Lovato E, Marone C, Fallacara L, Mancuso A, Ricciardi W, et al. The impact of electronic health records on healthcare quality: a systematic review and meta-analysis. *The European Journal of Public Health*. [Online] 2016;26(1): 60–64. Available from: doi:10.1093/eurpub/ckv122
10. Reis ZSN, Maia TA, Marcolino MS, Becerra-Posada F, Novillo-Ortiz D, Ribeiro ALP. Is There Evidence of Cost Benefits of Electronic Medical Records, Standards, or Interoperability in Hospital Information Systems? Overview of Systematic Reviews. *JMIR Medical Informatics*. [Online] 2017;5(3): e26. Available from: doi:10.2196/medinform.7400
11. World Health Organization (WHO). *eHealth in the Region of the Americas: breaking down the barriers to implementation*. [Online] 2016. Available from: <http://iris.paho.org/xmlui/bitstream/handle/123456789/31286/9789275119259-eng.pdf?sequence=6&isAllowed=y>
12. McAlearney AS, Sieck C, Hefner J, Robbins J, Huerta TR. Facilitating Ambulatory

- Electronic Health Record System Implementation: Evidence from a Qualitative Study. *BioMed Research International*. [Online] 2013;2013: 1–9. Available from: doi:10.1155/2013/629574
13. Dobrow MJ, Bytautas JP, Tharmalingam S, Hagens S. Interoperable Electronic Health Records and Health Information Exchanges: Systematic Review. *JMIR Medical Informatics*. [Online] 2019;7(2): e12607. Available from: doi:10.2196/12607
  14. Zahabi M, Kaber DB, Swangnetr M. Usability and Safety in Electronic Medical Records Interface Design: A Review of Recent Literature and Guideline Formulation. *Human Factors*. [Online] 2015;57(5): 805–834. Available from: doi:10.1177/0018720815576827
  15. Hersh WR, Totten AM, Eden KB, Devine B, Gorman P, Kassakian SZ, et al. Outcomes From Health Information Exchange: Systematic Review and Future Research Needs. *JMIR Medical Informatics*. [Online] 2015;3(4): e39. Available from: doi:10.2196/medinform.5215
  16. Moher D, Liberati A, Tetzlaff J, Altman DG, Altman D, Antes G, et al. Preferred reporting items for systematic reviews and meta-analyses: The PRISMA statement. *PLoS Medicine*. [Online] 2009;6(7). Available from: doi:10.1371/journal.pmed.1000097
  17. Landis JR, Koch GG. The Measurement of Observer Agreement for Categorical Data. *Biometrics*. [Online] 1977;33(1): 159. Available from: doi:10.2307/2529310
  18. McHugh ML. Interrater reliability: the kappa statistic. *Biochemia medica*. 2012;22(3): 276–282.
  19. Sterne JAC, Savović J, Page MJ, Elbers RG, Blencowe NS, Boutron I, et al. RoB 2: A revised tool for assessing risk of bias in randomised trials. *The BMJ*. [Online] 2019;366(August). Available from: doi:10.1136/bmj.l4898
  20. Sterne JA, Hernán MA, Reeves BC, Savović J, Berkman ND, Viswanathan M, et al. ROBINS-I: A tool for assessing risk of bias in non-randomised studies of interventions. *BMJ (Online)*. [Online] 2016;355: 4–10. Available from: doi:10.1136/bmj.i4919
  21. Drummond MF, Brien BJ, Torrance GW, Stoddart GL. *Methods for the Economic Evaluation of Health Care Programmes*.. 2nd ed. Oxford University Press; 1997.
  22. *Methods for the development of NICE public health guidance*. [Online]. 3rd n. National Institute for Clinical Excellence (NICE); 2018. Available from: <https://www.nice.org.uk/process/pmg4/resources/methods-for-the-development-of-nice-public-health-guidance-third-edition-pdf-2007967445701>
  23. Guyatt GH, Oxman AD, Vist GE, Kunz R, Falck-Ytter Y, Alonso-Coello P, et al. GRADE: an emerging consensus on rating quality of evidence and strength of recommendations. *BMJ*. [Online] 2008;336(7650): 924–926. Available from: doi:10.1136/bmj.39489.470347.AD
  24. Warren LR, Harrison M, Arora S, Darzi A. Working with patients and the public to design an electronic health record interface: A qualitative mixed-methods study. *BMC Medical Informatics and Decision Making*. [Online] BMC Medical Informatics and Decision Making; 2019;19(1): 1–8. Available from: doi:10.1186/s12911-019-0993-7

**PRISMA-P (Preferred Reporting Items for Systematic review and Meta-Analysis Protocols) 2015 checklist: recommended items to address in a systematic review protocol\***

| Section and topic                 | Item No. | Checklist item                                                                                                                                                                                                                | Reported on Page No. |
|-----------------------------------|----------|-------------------------------------------------------------------------------------------------------------------------------------------------------------------------------------------------------------------------------|----------------------|
| <b>ADMINISTRATIVE INFORMATION</b> |          |                                                                                                                                                                                                                               |                      |
| Title:                            |          |                                                                                                                                                                                                                               |                      |
| Identification                    | 1a       | Identify the report as a protocol of a systematic review                                                                                                                                                                      | 1                    |
| Update                            | 1b       | If the protocol is for an update of a previous systematic review, identify as such                                                                                                                                            | N/A                  |
| Registration                      | 2        | If registered, provide the name of the registry (such as PROSPERO) and registration number                                                                                                                                    | 3                    |
| Authors:                          |          |                                                                                                                                                                                                                               |                      |
| Contact                           | 3a       | Provide name, institutional affiliation, e-mail address of all protocol authors; provide physical mailing address of corresponding author                                                                                     | 1                    |
| Contributions                     | 3b       | Describe contributions of protocol authors and identify the guarantor of the review                                                                                                                                           | 1                    |
| Amendments                        | 4        | If the protocol represents an amendment of a previously completed or published protocol, identify as such and list changes; otherwise, state plan for documenting important protocol amendments                               | N/A                  |
| Support:                          |          |                                                                                                                                                                                                                               |                      |
| Sources                           | 5a       | Indicate sources of financial or other support for the review                                                                                                                                                                 | 8                    |
| Sponsor                           | 5b       | Provide name for the review funder and/or sponsor                                                                                                                                                                             | 8                    |
| Role of sponsor or funder         | 5c       | Describe roles of funder(s), sponsor(s), and/or institution(s), if any, in developing the protocol                                                                                                                            | 8                    |
| <b>INTRODUCTION</b>               |          |                                                                                                                                                                                                                               |                      |
| Rationale                         | 6        | Describe the rationale for the review in the context of what is already known                                                                                                                                                 | 4-5                  |
| Objectives                        | 7        | Provide an explicit statement of the question(s) the review will address with reference to participants, interventions, comparators, and outcomes (PICO)                                                                      | 5                    |
| <b>METHODS</b>                    |          |                                                                                                                                                                                                                               |                      |
| Eligibility criteria              | 8        | Specify the study characteristics (such as PICO, study design, setting, time frame) and report characteristics (such as years considered, language, publication status) to be used as criteria for eligibility for the review | 5-6                  |
| Information sources               | 9        | Describe all intended information sources (such as electronic databases, contact with study authors, trial registers or other grey literature sources) with planned dates of coverage                                         | 5                    |
| Search strategy                   | 10       | Present draft of search strategy to be used for at least one electronic database, including planned limits, such that it could be repeated                                                                                    | 5                    |



|                                    |     |                                                                                                                                                                                                                                                  |     |
|------------------------------------|-----|--------------------------------------------------------------------------------------------------------------------------------------------------------------------------------------------------------------------------------------------------|-----|
| Study records:                     |     |                                                                                                                                                                                                                                                  |     |
| Data management                    | 11a | Describe the mechanism(s) that will be used to manage records and data throughout the review                                                                                                                                                     | 6-7 |
| Selection process                  | 11b | State the process that will be used for selecting studies (such as two independent reviewers) through each phase of the review (that is, screening, eligibility and inclusion in meta-analysis)                                                  | 6   |
| Data collection process            | 11c | Describe planned method of extracting data from reports (such as piloting forms, done independently, in duplicate), any processes for obtaining and confirming data from investigators                                                           | 6-7 |
| Data items                         | 12  | List and define all variables for which data will be sought (such as PICO items, funding sources), any pre-planned data assumptions and simplifications                                                                                          | 6   |
| Outcomes and prioritization        | 13  | List and define all outcomes for which data will be sought, including prioritization of main and additional outcomes, with rationale                                                                                                             | 6   |
| Risk of bias in individual studies | 14  | Describe anticipated methods for assessing risk of bias of individual studies, including whether this will be done at the outcome or study level, or both; state how this information will be used in data synthesis                             | 6-7 |
| Data synthesis                     | 15a | Describe criteria under which study data will be quantitatively synthesised                                                                                                                                                                      | 6-7 |
|                                    | 15b | If data are appropriate for quantitative synthesis, describe planned summary measures, methods of handling data and methods of combining data from studies, including any planned exploration of consistency (such as $I^2$ , Kendall's $\tau$ ) | 7   |
|                                    | 15c | Describe any proposed additional analyses (such as sensitivity or subgroup analyses, meta-regression)                                                                                                                                            | -   |
|                                    | 15d | If quantitative synthesis is not appropriate, describe the type of summary planned                                                                                                                                                               | 7   |
| Meta-bias(es)                      | 16  | Specify any planned assessment of meta-bias(es) (such as publication bias across studies, selective reporting within studies)                                                                                                                    | 6-7 |
| Confidence in cumulative evidence  | 17  | Describe how the strength of the body of evidence will be assessed (such as GRADE)                                                                                                                                                               | 7   |

**\* It is strongly recommended that this checklist be read in conjunction with the PRISMA-P Explanation and Elaboration (cite when available) for important clarification on the items. Amendments to a review protocol should be tracked and dated. The copyright for PRISMA-P (including checklist) is held by the PRISMA-P Group and is distributed under a Creative Commons Attribution Licence 4.0.**

*From: Shamseer L, Moher D, Clarke M, Ghersi D, Liberati A, Petticrew M, Shekelle P, Stewart L, PRISMA-P Group. Preferred reporting items for systematic review and meta-analysis protocols (PRISMA-P) 2015: elaboration and explanation. BMJ. 2015 Jan 2;349(jan02 1):g7647.*

# BMJ Open

## Electronic Health Records, Interoperability, and Patient Safety in Health Systems of High-Income Countries: A Systematic Review Protocol

|                                 |                                                                                                                                                                                                                                                                                                                                                                                                                                                                                                                                                                                                                                                                                                                                                                                                                                                                                                                                                                                                                                                                                                                                                                                                                       |
|---------------------------------|-----------------------------------------------------------------------------------------------------------------------------------------------------------------------------------------------------------------------------------------------------------------------------------------------------------------------------------------------------------------------------------------------------------------------------------------------------------------------------------------------------------------------------------------------------------------------------------------------------------------------------------------------------------------------------------------------------------------------------------------------------------------------------------------------------------------------------------------------------------------------------------------------------------------------------------------------------------------------------------------------------------------------------------------------------------------------------------------------------------------------------------------------------------------------------------------------------------------------|
| Journal:                        | <i>BMJ Open</i>                                                                                                                                                                                                                                                                                                                                                                                                                                                                                                                                                                                                                                                                                                                                                                                                                                                                                                                                                                                                                                                                                                                                                                                                       |
| Manuscript ID                   | bmjopen-2020-044941.R1                                                                                                                                                                                                                                                                                                                                                                                                                                                                                                                                                                                                                                                                                                                                                                                                                                                                                                                                                                                                                                                                                                                                                                                                |
| Article Type:                   | Protocol                                                                                                                                                                                                                                                                                                                                                                                                                                                                                                                                                                                                                                                                                                                                                                                                                                                                                                                                                                                                                                                                                                                                                                                                              |
| Date Submitted by the Author:   | 04-Feb-2021                                                                                                                                                                                                                                                                                                                                                                                                                                                                                                                                                                                                                                                                                                                                                                                                                                                                                                                                                                                                                                                                                                                                                                                                           |
| Complete List of Authors:       | <p>Li, Edmond; Imperial College London, Patient Safety Translational Research Centre, Institute of Global Health Innovation, Department of Surgery &amp; Cancer; London School of Hygiene and Tropical Medicine Faculty of Infectious and Tropical Diseases, Clinical Research Department</p> <p>Neves, Ana Luisa; Imperial College London, Patient Safety Translational Research Centre, Institute of Global Health Innovation, Department of Surgery &amp; Cancer; University of Porto, Center for Health Technology and Services Research / Department of Community Medicine, Health Information and Decision</p> <p>Clarke, Jonathan; Imperial College London, Patient Safety Translational Research Centre, Institute of Global Health Innovation, Department of Surgery &amp; Cancer; Imperial College London, Centre for Mathematics of Precision Healthcare</p> <p>Ashrafian, Hutan; Imperial College London, Patient Safety Translational Research Centre, Institute of Global Health Innovation, Department of Surgery &amp; Cancer</p> <p>Darzi, Ara; Imperial College London, Patient Safety Translational Research Centre, Institute of Global Health Innovation, Department of Surgery &amp; Cancer</p> |
| <b>Primary Subject Heading</b>: | Health informatics                                                                                                                                                                                                                                                                                                                                                                                                                                                                                                                                                                                                                                                                                                                                                                                                                                                                                                                                                                                                                                                                                                                                                                                                    |
| Secondary Subject Heading:      | Health policy, Public health, Health services research                                                                                                                                                                                                                                                                                                                                                                                                                                                                                                                                                                                                                                                                                                                                                                                                                                                                                                                                                                                                                                                                                                                                                                |
| Keywords:                       | Health informatics < BIOTECHNOLOGY & BIOINFORMATICS, Telemedicine < BIOTECHNOLOGY & BIOINFORMATICS, Information technology < BIOTECHNOLOGY & BIOINFORMATICS, Information management < BIOTECHNOLOGY & BIOINFORMATICS, HEALTH SERVICES ADMINISTRATION & MANAGEMENT, Health policy < HEALTH SERVICES ADMINISTRATION & MANAGEMENT                                                                                                                                                                                                                                                                                                                                                                                                                                                                                                                                                                                                                                                                                                                                                                                                                                                                                        |
|                                 |                                                                                                                                                                                                                                                                                                                                                                                                                                                                                                                                                                                                                                                                                                                                                                                                                                                                                                                                                                                                                                                                                                                                                                                                                       |

SCHOLARONE™  
Manuscripts





I, the Submitting Author has the right to grant and does grant on behalf of all authors of the Work (as defined in the below author licence), an exclusive licence and/or a non-exclusive licence for contributions from authors who are: i) UK Crown employees; ii) where BMJ has agreed a CC-BY licence shall apply, and/or iii) in accordance with the terms applicable for US Federal Government officers or employees acting as part of their official duties; on a worldwide, perpetual, irrevocable, royalty-free basis to BMJ Publishing Group Ltd ("BMJ") its licensees and where the relevant Journal is co-owned by BMJ to the co-owners of the Journal, to publish the Work in this journal and any other BMJ products and to exploit all rights, as set out in our [licence](#).

The Submitting Author accepts and understands that any supply made under these terms is made by BMJ to the Submitting Author unless you are acting as an employee on behalf of your employer or a postgraduate student of an affiliated institution which is paying any applicable article publishing charge ("APC") for Open Access articles. Where the Submitting Author wishes to make the Work available on an Open Access basis (and intends to pay the relevant APC), the terms of reuse of such Open Access shall be governed by a Creative Commons licence – details of these licences and which [Creative Commons](#) licence will apply to this Work are set out in our licence referred to above.

Other than as permitted in any relevant BMJ Author's Self Archiving Policies, I confirm this Work has not been accepted for publication elsewhere, is not being considered for publication elsewhere and does not duplicate material already published. I confirm all authors consent to publication of this Work and authorise the granting of this licence.

# 1 **Electronic Health Records, Interoperability, and Patient Safety in** 2 **Health Systems of High-Income Countries: A Systematic Review** 3 **Protocol**

4 Edmond Li<sup>[1]</sup>, Ana Luisa Neves<sup>[1,2]</sup>, Jonathan Clarke<sup>[1,3]</sup>, Hutan Ashrafian<sup>[1]</sup>, Ara Darzi<sup>[1]</sup>

5 <sup>[1]</sup>Imperial NIHR Patient Safety Translational Research Centre (PSTRC), Institute of Global  
6 Health Innovation (IGHI), Imperial College London, London, United Kingdom

7 <sup>[2]</sup> Department of Community Medicine, Information and Health Decision Sciences (MEDCIDS)  
8 / Center for Health Technology and Services Research (CINTESIS), University of Porto, Porto,  
9 Portugal.

10 <sup>[3]</sup> Centre for Mathematics of Precision Healthcare, Imperial College London, London, United  
11 Kingdom

## 31 **Corresponding author**

32 Name: Edmond Li

33 Email: [edmond.li19@imperial.ac.uk](mailto:edmond.li19@imperial.ac.uk)

34 Address: Institute of Global Health Innovation, Room 1035/7, QEQM Wing, St Mary's Campus,  
35 London W2 1NY

36 **Keywords [MeSH terms]:** electronic health records, electronic medical records, computerised  
37 patient records, health information technology, health information exchanges, interoperability,  
38 patient safety, patient harm, adverse events, health outcomes

39 **Word count:** 2723

## 41 Abstract

### 42 Introduction

43 The availability and routine use of electronic health records (EHRs) have become commonplace  
44 in healthcare systems of many high-income countries. While there is an ever-growing body of  
45 literature pertaining to EHR use, evidence surrounding the importance of EHR interoperability  
46 and its impact on patient safety remains less clear. There is therefore a need and opportunity to  
47 evaluate the evidence available regarding this relationship so as to better inform health  
48 informatics development and policies in the years to come.

### 50 Objective

51 This systematic review aims to evaluate the impact of EHR interoperability on patient safety in  
52 health systems of high-income countries.

### 54 Methods and analysis

55 A systematic literature review will be conducted via a computerised search through four  
56 databases: PubMed, Embase, HMIC, and PsycInfo for relevant articles published between 2010  
57 and 2020. Outcomes of interest will include: impact on patient safety, and the broader effects on  
58 health systems. Quality of the randomised quantitative studies will be assessed using Cochrane  
59 Risk of Bias Tool. Non-randomised papers will be evaluated with the Risk of Bias In Non-  
60 Randomised Studies - of Interventions (ROBINS-I) tool. Drummond's Checklist will be utilised  
61 for publications pertaining to economic evaluation. The National Institute for Health and Care  
62 Excellence (NICE) quality appraisal checklist will be used to assess qualitative studies. A  
63 narrative synthesis will be conducted for included studies, and the body of evidence will be  
64 summarised in a summary of findings table.

### 66 Ethics and dissemination

67 This review will summarise published studies with non-identifiable data and therefore does not  
68 require ethical approval. This protocol complies with the Preferred Reporting Items for  
69 Systematic Review and Meta-Analyses Protocols guidelines. Findings will be disseminated  
70 through preprints, open access peer-reviewed publication, and conference presentations. Patients  
71 or members of the public were not involved in the design of this study.

## 73 Article Summary

### 74 Strengths and limitations of this study

#### 75 Strengths

- 76 • Inclusion of quantitative, qualitative, and mixed-methods studies can provide a  
77 comprehensive overview of the multitude of ways in which interoperable EHRs may  
78 affect patient safety and health systems.
- 79 • The proposed review attempts to answer a pragmatic question which is integral to  
80 influencing future health informatics development and policies.

#### 82 Limitations

- 83 • The heterogeneity of methods and outcomes assessed may obscure the true effect  
84 interoperable EHRs have had on patient safety in the clinical setting.

- 1  
2  
3 85 • Potential small sample size in subgroup analyses, may negatively impact the statistical  
4 86 power in quantitative data synthesis.  
5 87 • Limiting the search strategy to English-only publications may not capture studies  
6 88 exploring the EHR interoperability experiences of health systems in non-English  
7 89 speaking countries.  
8 90

9 91 [PROSPERO registration number \[CRD42020209285\]](#)

10 92 This is an open access article distributed in accordance with the Creative Commons Attribution  
11 93 4.0 Unported (CC BY 4.0) license, which permits others to copy, redistribute, remix, transform  
12 94 and build upon this work for any purpose, provided the original work is properly cited, a link to  
13 95 the licence is given, and indication of whether changes were made. See:  
14 96 <https://creativecommons.org/licenses/by/4.0/>.

## 97 Introduction

98 Electronic health records (EHRs) have become an integral part of modern healthcare since their  
99 initial mainstream implementation in the mid-late 2000s through the passing of the Health  
100 Information Technology for Economic and Clinical Health Act (HITECH) in the United States  
101 and the NHS National Programme for IT initiative (NPfIT) in England (1–4). From the  
102 documentation & retrieval of patient records and the prescription of medications, to coordinating  
103 complex care plans between different healthcare providers and electronic billing, EHRs fulfil a  
104 multitude of roles for both clinicians and patients alike (5–9).

105  
106 In order to achieve EHR's full potential, it is critical to improve interoperability - i.e., “*the ability*  
107 *of health information systems to work together within and across organisation boundaries in*  
108 *order to advance effective delivery of healthcare for individuals and communities*” (10). The lack  
109 of universal interoperability is often cited as one of the many significant shortcomings of EHRs  
110 currently in use, resulting in duplication in healthcare costs, increased clinician workload fatigue,  
111 and poses a potential risk to patient safety (2). This is especially problematic for patient  
112 populations with chronic conditions, polypharmacy, and multiple comorbidities who are reliant  
113 upon effective patient information sharing via EHRs to facilitate their care (11).

114  
115 Poor EHR interoperability is detrimental to patient safety and costly for health systems. Its  
116 consequences range from increased risks of medication errors, fragmentation of patient data, to  
117 iatrogenic harm resulting from redundant testing, and additional healthcare expenditure (12–17).  
118 In the fragmented EHR landscape of the United Kingdom, measuring the effect poor EHR  
119 interoperability has in the National Health Service (NHS), remain challenging (18). Although  
120 there is a growing body of literature investigating areas such as the facilitators and barriers to  
121 EHR greater adoption, technical capabilities, and usability (19,20), no systematic review has  
122 been conducted exploring specifically the problem of interoperability amongst the assortment of  
123 EHRs in use, how it affects patient safety, and ultimately the financial cost savings lost to health  
124 systems.

125  
126 In a recent systematic review by Dobrow *et al.* assessing the effects of EHR and HIT  
127 interoperability on health systems, 130 publications were included, with the majority being  
128 studies conducted in the United States, utilised quantitative methods, and focussed primarily in  
129 acute healthcare settings. The authors noted the use of interoperable EHRs had a positive impact  
130 on outcomes measures such as quality of care and productivity (19). However, in domains such  
131 as stakeholder engagement, performance & reliability, security & privacy, information quality,  
132 and ease of use, the benefits of interoperable EHRs was less clear (19). Amongst the 130  
133 publications, 17 were reviews with the majority directed at exploring facilitators & barriers to  
134 EHR implementation, and the general benefits and impact of EHR use. While this review did  
135 focus on studies pertaining to the topic of interoperable EHRs, this was done so only from a  
136 broad perspective and included studies exploring a wide range of outcomes related to the effects  
137 of EHR on healthcare rather than specifically on their implications to patient safety.

138  
139 In another review by Hersh *et al.*, the authors explored how health information exchange (HIE)  
140 affected health systems on a variety of domains, including costs, healthcare utilisation, health

141 outcomes, healthcare worker attitudes, and sustainability. Despite the widespread routinely use  
 142 of HIE, the authors described a general lack of robust evidence on the quality, costs, efficiency,  
 143 usage, and sustainability (21). However, there was some evidence demonstrating HIEs being  
 144 associated with reduced utilisation and costs in emergency care settings despite methodological  
 145 issues being present in many of the included publications (21). Although this review was  
 146 ambitious in the wide scope of interest regarding the effects of HIE use, patient safety was not a  
 147 primary topic of focus. Another limitation of this study was that it only contained US-based  
 148 publications, and thus findings lack generalisability internationally to other health systems in  
 149 high-income countries (HIC) which are both organised, financed differently.

## 150 Research aim

151 The overall aim of this literature review is to explore how EHR interoperability impacts patient  
 152 safety, in the context of health systems in HICs. The results generated will aim to inform  
 153 healthcare policymakers and help shape more effective EHR system implementation and  
 154 modernisation efforts in the coming years.

## 155 Methods and analysis

### 156 Search strategy

157 A computerised search of the literature published in the last 10 years (2010 to 2020) search will  
 158 be performed on PubMed/Medline, Embase, Cumulative Index to Nursing and Allied Health  
 159 Literature (CINAHL), Health Management Information Consortium (HMIC), and PsycInfo. This  
 160 publication timeframe was chosen as it coincides with the mainstream implementation of EHRs  
 161 in several HIC healthcare systems such as Kaiser Permanente in the US, and thus would select  
 162 for the most up to date, relevant evidence concerning EHR interoperability and patient safety  
 163 challenges faced by healthcare systems today to be included (22,23). The list of search strings  
 164 used will include both free text and controlled terms, whenever supported (Table 1) and will be  
 165 iteratively refined in consultation with the Imperial College St. Mary's campus medical librarian.

166 Grey literature sources will also be searched, including registrations in the International  
 167 Prospective Register of Systematic Reviews, reports of relevant stakeholder organisations (NHS  
 168 England, American Medical Informatics Association (AMIA), eHealth at WHO, and conference  
 169 proceedings (last 5 years) of several related conferences (AMIA, MedInfo, Medicine 2.0,  
 170 Medicine X)), in order to identify possible additional studies that meet the inclusion criteria.

171 The search has also been restricted to HIC and articles published in English only.

172 *Table 1: Concepts and database search terms*

| Electronic health records                                                                                                                                           |            | Interoperability                                                                                                                                   |            | Patient safety                                                                                                                                                       |
|---------------------------------------------------------------------------------------------------------------------------------------------------------------------|------------|----------------------------------------------------------------------------------------------------------------------------------------------------|------------|----------------------------------------------------------------------------------------------------------------------------------------------------------------------|
| <ul style="list-style-type: none"> <li>● Electronic health records</li> <li>● Electronic medical records</li> <li>● Computerised medical records systems</li> </ul> | <b>AND</b> | <ul style="list-style-type: none"> <li>● Interoperability</li> <li>● Health information interoperability</li> <li>● Systems integration</li> </ul> | <b>AND</b> | <ul style="list-style-type: none"> <li>● Patient safety</li> <li>● Patient adj1 incident*</li> <li>● Adverse adj1 event*</li> <li>● Patient adj1 outcome*</li> </ul> |

|                                                                                                                                                                                                                                                |  |  |  |                                                                                                  |
|------------------------------------------------------------------------------------------------------------------------------------------------------------------------------------------------------------------------------------------------|--|--|--|--------------------------------------------------------------------------------------------------|
| <ul style="list-style-type: none"> <li>● Health information exchange / HIE</li> <li>● Health information technology / HIT</li> <li>● Hospital information systems</li> <li>● Medical informatics</li> <li>● Medical records linkage</li> </ul> |  |  |  | <ul style="list-style-type: none"> <li>● Patient adjl harm</li> <li>● Risk management</li> </ul> |
|------------------------------------------------------------------------------------------------------------------------------------------------------------------------------------------------------------------------------------------------|--|--|--|--------------------------------------------------------------------------------------------------|

173

### 174 Study selection criteria

175 A summary of the population, intervention, comparison, outcomes, and type of studies being  
 176 considered is provided in **Table 2**. This systematic review will focus on studies performed in  
 177 high-income countries and published in English only. Studies assessing the impact of EHR  
 178 interoperability will be included. Interventions will include EHR systems interoperable with  
 179 other health information technology systems both within and across healthcare facilities, as well  
 180 as those used in tertiary and community settings. The primary outcomes to be considered in this  
 181 review will be safety outcomes, including adverse events/incidents, safety-related patient  
 182 experiences, and health outcomes. In addition, secondary outcomes would include studies  
 183 exploring the broader impact of interoperable EHRs on health systems such as cost effectiveness  
 184 and clinical culture amongst healthcare providers on the topic Quantitative, qualitative, and  
 185 mixed methods studies will be included. Reference lists of the selected articles will also be  
 186 screened for papers which may have been missed by the initial database search but still meet the  
 187 eligibility criteria.

188

189 *Table 2: PICO inclusion criteria*

|                     |                                                           |
|---------------------|-----------------------------------------------------------|
| <i>Population</i>   | High-income countries utilising electronic health records |
| <i>Intervention</i> | EHRs with interoperability                                |
| <i>Comparison</i>   | Usual care (i.e., existing baseline of interoperability)  |
| <i>Outcome</i>      | Impact on patient safety and quality of care              |

### 190 Screening

191 Articles to be included will be screened by two independent reviewers, following the process  
 192 described in the Preferred Reporting Items for Systematic Reviews and Meta-Analyses  
 193 (PRISMA) flow diagram (24). The initial screening will be done by the first reviewer based on  
 194 the publication titles, followed by a second screening based on the abstracts. Included abstracts  
 195 will then be fully reviewed by two independent researchers to produce a unified selection of  
 196 articles to be included in this review. Cohen's kappa will be calculated to ensure inter-rater  
 197 agreement and consistency in the selection of studies to be included (25,26). Any disagreements  
 198 will be resolved by consensus; if a Cohen's kappa value of less than 0.6 is reported, the  
 199 discrepancies will be addressed through discussions with a more experienced third investigator.



## 200 Data extraction

201 Data extraction will be performed using a standardised extraction table for each of the two  
202 investigators to summarise the characteristics and findings of each included study, including  
203 name of the first author, year of publication, study design, number of participants, retention rates,  
204 setting characteristics, outcome measures, and main results. The content of the two summary  
205 tables will then be aggregated and reviewed once more by both investigators, with any  
206 disagreements being solved by the third senior investigator.

## 208 Quality assessment

209 The quality of randomised controlled trials and cluster randomised trials will be assessed using  
210 the Cochrane Risk of Bias Tool (27), and the quality of non-randomised intervention studies (i.e.,  
211 case control, cohort, quasi-experimental) will be appraised using the 'Risk of Bias In Non-  
212 Randomised Studies - of Interventions' (ROBINS-I) tool (28). For cost-effectiveness studies, the  
213 Drummond's checklist for assessing economic evaluations will be used (29). The National  
214 Institute for Health and Care Excellence (NICE) quality appraisal checklist will be utilised to  
215 assess the selected qualitative studies (30). Two independent reviewers will score the selected  
216 studies and any disagreements will be resolved by a third person. A risk of bias table along with  
217 an overall, collective bias narrative will be produced to summarise the biases of outcomes  
218 observed amongst the evaluated studies.

## 220 Narrative synthesis, subgroup analysis, and meta-analysis

221 A narrative synthesis will be performed for all studies included in this systematic review to  
222 summarise any salient findings observed (31).

224 In quantitative studies with homogenous or comparable outcome measures, whenever possible,  
225 continuous and dichotomous outcomes will be pooled together in a meta-analysis. If possible,  
226 effect sizes will be transformed in a common metric (Hedges'  $g$  – the bias-corrected standardised  
227 difference in means) and classified as positive when in favour of the intervention. Heterogeneity  
228 will be assessed using  $I^2$  and the presence of publication bias will be evaluated using a funnel  
229 plot and the Duval and Tweedie's trim and fill method (32).

231 For both qualitative and quantitative studies that report comparable outcomes, a subgroup  
232 analysis based on clinical settings (e.g., primary vs. secondary healthcare settings) will be  
233 conducted to explore any patterns or relationships ascertained from the data. Through a  
234 standardised spreadsheet shared amongst the reviewers, the body of evidence will be organised  
235 in two separate Summary of Findings tables (for both qualitative and quantitative studies) in  
236 accordance to the 'Grading of Recommendations Assessment, Development and Evaluation'  
237 (GRADE) criteria (33).

## 239 Patient and public involvement

240 This systematic literature review saw no direct participation by patients or the public during the  
241 design of this study. However, this study was designed following a series of structured  
242 interviews with patients regarding their experience of attending multiple institutions for hospital  
243 care (34). As this literature review will be used to form the basis for subsequent studies exploring  
244 the topic including ones involving patients, findings from this review will be shared with patient



245 research groups to gain feedback and encourage further discourse surrounding the topic of EHR  
246 interoperability and patient safety.

## 248 Amendments

249 Any amendments to this protocol will be documented with reference to saved searches and  
250 analysis methods, which will be recorded in bibliographic databases, Mendeley and Excel  
251 templates for data collection and synthesis.

## 252 Discussion

253 One of the primary strengths stemming from the almost exploratory nature of this systematic  
254 review is the ability to generate a succinct, comprehensive appraisal of the best evidence  
255 currently available regarding how EHR interoperability impacts patient care and safety. By  
256 publishing this review protocol beforehand, we demonstrate a clear, robust, and transparent  
257 approach to aggregating the anticipated assortment of literature on the subject in question.

258  
259 There are also some limitations to be acknowledged. By restricting the inclusion criteria to  
260 publications made English only, this could potentially exclude relevant papers pertaining to  
261 interoperable EHR systems in non-English healthcare settings. However, this is expected to be  
262 minimal as the majority of the papers concerning this topic published from the United States and  
263 European countries and are primarily done so in English journals. It must also be noted that both  
264 the heterogeneity of measures and outcomes evaluated, as well as the potentially reduced number  
265 of studies in subgroup analyses, may negatively influence the statistical power in data synthesis,  
266 and may preclude pooling of data as a meta-analysis. With such diverse means of measuring and  
267 assessing the effects of EHR interoperability, this will likely make comparisons between studies  
268 difficult and may obscure the true measure of effect EHR interoperability has had in the clinical  
269 setting. To mitigate this risk, outcomes will be grouped whenever possible, and summarised as a  
270 narrative synthesis. However, this can also represent a strength, as it will provide a  
271 comprehensive overview on the subject, capitalising on various research methodologies and  
272 providing novel insights on the impact of interoperable EHR systems on patient safety.

## 273 Acknowledgments

274 We would like to thank Michael Gainsford (Library Manager and Liaison Librarian at Imperial  
275 College London) for his support and guidance provided to improve the composition of the search  
276 terms and procedural aspects of the overall search strategy.

## 277 Authors' contributions

278 Conception and design of the work: ECL, ALN, and JC wrote the manuscript. HA, and AD  
279 provided critical revision of drafts for important intellectual content. All authors provided input  
280 into drafts of the manuscript and agree on the contents of the final version.

## 281 Funding statement

282 This research was supported through the Imperial College National Institute for Health Research  
283 (NIHR) Patient Safety Translational Research Centre (PSTRC) and the Imperial College  
284 Biomedical Research Centre (BRC). JC acknowledges support from the Wellcome Trust

1  
2  
3 285 [215938/Z/19/Z]. However, the funder/sponsor has had no role in development and drafting of  
4 286 this protocol.  
5

## 6 287 **Competing Interests**

8 288 The authors declare that there are no competing interests.  
9  
10  
11  
12  
13  
14  
15  
16  
17  
18  
19  
20  
21  
22  
23  
24  
25  
26  
27  
28  
29  
30  
31  
32  
33  
34  
35  
36  
37  
38  
39  
40  
41  
42  
43  
44  
45  
46  
47  
48  
49  
50  
51  
52  
53  
54  
55  
56  
57  
58  
59  
60

For peer review only

## References

1. Colicchio TK, Cimino JJ, Del Fiol G. Unintended consequences of nationwide electronic health record adoption: Challenges and opportunities in the post-meaningful use era. *Journal of Medical Internet Research*. [Online] 2019;21(6): 1–9. Available from: doi:10.2196/13313
2. Roman LC, Ancker JS, Johnson SB, Senathirajah Y. Navigation in the electronic health record: A review of the safety and usability literature. *Journal of Biomedical Informatics*. [Online] Elsevier Inc.; 2017;67: 69–79. Available from: doi:10.1016/j.jbi.2017.01.005
3. Justinia T. The UK’s National Programme for IT: Why was it dismantled? *Health Services Management Research*. [Online] 2017;30(1): 2–9. Available from: doi:10.1177/0951484816662492
4. Wachter RM. Making IT work : harnessing the power of health IT to improve care in England. *National Advisory Group on Health Information Technology in England*. [Online] 2016; 71. Available from: [https://www.gov.uk/government/uploads/system/uploads/attachment\\_data/file/550866/Wachter\\_Review\\_Accessible.pdf](https://www.gov.uk/government/uploads/system/uploads/attachment_data/file/550866/Wachter_Review_Accessible.pdf)  
[https://assets.publishing.service.gov.uk/government/uploads/system/uploads/attachment\\_data/file/550866/Wachter\\_Review\\_Accessible.pdf](https://assets.publishing.service.gov.uk/government/uploads/system/uploads/attachment_data/file/550866/Wachter_Review_Accessible.pdf)
5. Kruse CS, Kristof C, Jones B, Mitchell E, Martinez A. Barriers to Electronic Health Record Adoption: a Systematic Literature Review. *Journal of Medical Systems*. [Online] *Journal of Medical Systems*; 2016;40(12). Available from: doi:10.1007/s10916-016-0628-9
6. Ayaad O, Alloubani A, ALhajaa EA, Farhan M, Abuseif S, Al Hroub A, et al. The role of electronic medical records in improving the quality of health care services: Comparative study. *International Journal of Medical Informatics*. [Online] Elsevier; 2019;127(April): 63–67. Available from: doi:10.1016/j.ijmedinf.2019.04.014
7. Evans RS. Electronic Health Records: Then, Now, and in the Future. *Yearbook of Medical Informatics*. [Online] 2016;25(S 01): S48–S61. Available from: doi:10.15265/IYS-2016-s006
8. Gagnon MP, Payne-Gagnon J, Breton E, Fortin JP, Khoury L, Dolovich L, et al. Adoption of electronic personal health records in Canada: Perceptions of stakeholders. *International Journal of Health Policy and Management*. [Online] 2016;5(7): 425–433. Available from: doi:10.15171/ijhpm.2016.36
9. Campanella P, Lovato E, Marone C, Fallacara L, Mancuso A, Ricciardi W, et al. The impact of electronic health records on healthcare quality: a systematic review and meta-analysis. *The European Journal of Public Health*. [Online] 2016;26(1): 60–64. Available from: doi:10.1093/eurpub/ckv122
10. Reis ZSN, Maia TA, Marcolino MS, Becerra-Posada F, Novillo-Ortiz D, Ribeiro ALP. Is There Evidence of Cost Benefits of Electronic Medical Records, Standards, or Interoperability in Hospital Information Systems? Overview of Systematic Reviews. *JMIR Medical Informatics*. [Online] 2017;5(3): e26. Available from: doi:10.2196/medinform.7400
11. World Health Organization (WHO). *eHealth in the Region of the Americas: breaking down the barriers to implementation*. [Online] 2016. Available from: <http://iris.paho.org/xmlui/bitstream/handle/123456789/31286/9789275119259-eng.pdf?sequence=6&isAllowed=y>
12. Zaheer S, Pimentel SD, Simmons KD, Kuo LE, Datta J, Williams N, et al. Comparing

- 1  
2  
3 335 International and United States Undergraduate Medical Education and Surgical Outcomes  
4 336 Using a Refined Balance Matching Methodology. *Annals of Surgery*. [Online] 2017;  
5 337 Available from: doi:10.1097/SLA.0000000000001878  
6  
7 338 13. Everson J, Adler-Milstein J. Gaps in health information exchange between hospitals that  
8 339 treat many shared patients. *Journal of the American Medical Informatics Association*.  
9 340 [Online] 2018;25(9): 1114–1121. Available from: doi:10.1093/jamia/ocy089  
10 341 14. Thompson MP, Graetz I. Hospital adoption of interoperability functions. *Healthcare*.  
11 342 [Online] Elsevier Inc.; 2019;7(3): 100347. Available from:  
12 343 doi:10.1016/j.hjdsi.2018.12.001  
13 344 15. Tapuria A, Kalra D, Kobayashi S. Contribution of clinical archetypes, and the challenges,  
14 345 towards achieving semantic interoperability for EHRs. *Healthcare Informatics Research*.  
15 346 [Online] 2013;19(4): 286–292. Available from: doi:10.4258/hir.2013.19.4.286  
16 347 16. Warren LR, Clarke JM, Arora S, Darzi AW. Improving data sharing between acute  
17 348 hospitals in England: an overview of health record system distribution and retrospective  
18 349 observational analysis of inter-hospital transitions of care. *BMJ Open*. [Online]  
19 350 2019;9(12): e031637. Available from: doi:10.1136/bmjopen-2019-031637  
20 351 17. Clarke JM, Warren LR, Arora S, Barahona M, Darzi AW. Guiding interoperable  
21 352 electronic health records through patient-sharing networks. *npj Digital Medicine*. [Online]  
22 353 Springer US; 2018;1(1): 1–6. Available from: doi:10.1038/s41746-018-0072-y  
23 354 18. McAlearney AS, Sieck C, Hefner J, Robbins J, Huerta TR. Facilitating Ambulatory  
24 355 Electronic Health Record System Implementation: Evidence from a Qualitative Study.  
25 356 *BioMed Research International*. [Online] 2013;2013: 1–9. Available from:  
26 357 doi:10.1155/2013/629574  
27 358 19. Dobrow MJ, Bytautas JP, Tharmalingam S, Hagens S. Interoperable Electronic Health  
28 359 Records and Health Information Exchanges: Systematic Review. *JMIR Medical*  
29 360 *Informatics*. [Online] 2019;7(2): e12607. Available from: doi:10.2196/12607  
30 361 20. Zahabi M, Kaber DB, Swangnetr M. Usability and Safety in Electronic Medical Records  
31 362 Interface Design: A Review of Recent Literature and Guideline Formulation. *Human*  
32 363 *Factors*. [Online] 2015;57(5): 805–834. Available from: doi:10.1177/0018720815576827  
33 364 21. Hersh WR, Totten AM, Eden KB, Devine B, Gorman P, Kassakian SZ, et al. Outcomes  
34 365 From Health Information Exchange: Systematic Review and Future Research Needs.  
35 366 *JMIR Medical Informatics*. [Online] 2015;3(4): e39. Available from:  
36 367 doi:10.2196/medinform.5215  
37 368 22. Wheatley B. Transforming care delivery through health information technology. *The*  
38 369 *Permanente journal*. [Online] Winter; 2013;17(1): 81–86. Available from:  
39 370 doi:10.7812/TPP/12-030 [Accessed: 20th January 2021]  
40 371 23. Chen C, Permanente K. The Kaiser Permanente Electronic Health Record: Transforming  
41 372 And Streamlining Modalities Of Care. 2009; Available from: doi:10.1377/hlthaff.28.2.323  
42 373 [Accessed: 22nd January 2021]  
43 374 24. Moher D, Liberati A, Tetzlaff J, Altman DG, Altman D, Antes G, et al. Preferred  
44 375 reporting items for systematic reviews and meta-analyses: The PRISMA statement. *PLoS*  
45 376 *Medicine*. [Online] 2009;6(7). Available from: doi:10.1371/journal.pmed.1000097  
46 377 25. Landis JR, Koch GG. The Measurement of Observer Agreement for Categorical Data.  
47 378 *Biometrics*. [Online] 1977;33(1): 159. Available from: doi:10.2307/2529310  
48 379 26. McHugh ML. Interrater reliability: the kappa statistic. *Biochemia medica*. 2012;22(3):  
49 380 276–282.

- 1  
2  
3 381 27. Sterne JAC, Savović J, Page MJ, Elbers RG, Blencowe NS, Boutron I, et al. RoB 2: A  
4 382 revised tool for assessing risk of bias in randomised trials. *The BMJ*. [Online]  
5 383 2019;366(August). Available from: doi:10.1136/bmj.l4898  
6 384 28. Sterne JA, Hernán MA, Reeves BC, Savović J, Berkman ND, Viswanathan M, et al.  
7 385 ROBINS-I: A tool for assessing risk of bias in non-randomised studies of interventions.  
8 386 *BMJ (Online)*. [Online] 2016;355: 4–10. Available from: doi:10.1136/bmj.i4919  
9 387 29. Drummond MF, Brien BJ, Torrance GW, Stoddart GL. *Methods for the Economic*  
10 388 *Evaluation of Health Care Programmes*.. 2nd ed. Oxford University Press; 1997.  
11 389 30. *Methods for the development of NICE public health guidance*. [Online]. 3rd n. National  
12 390 Institute for Clinical Excellence (NICE); 2018. Available from:  
13 391 [https://www.nice.org.uk/process/pmg4/resources/methods-for-the-development-of-nice-](https://www.nice.org.uk/process/pmg4/resources/methods-for-the-development-of-nice-public-health-guidance-third-edition-pdf-2007967445701)  
14 392 [public-health-guidance-third-edition-pdf-2007967445701](https://www.nice.org.uk/process/pmg4/resources/methods-for-the-development-of-nice-public-health-guidance-third-edition-pdf-2007967445701)  
15 393 31. Popay, J., Roberts, H., Sowden, A., Petticrew, M., Arai, L., Rodgers, M., ... & Duffy S.  
16 394 Guidance on the conduct of narrative synthesis in systematic reviews. A product from the  
17 395 ESRC methods programme. 2006;(April 2006): 1–92.  
18 396 32. Duval S, Tweedie R. Trim and fill: A simple funnel-plot-based method of testing and  
19 397 adjusting for publication bias in meta-analysis. *Biometrics*. [Online] Biometric Society;  
20 398 2000;56(2): 455–463. Available from: doi:10.1111/j.0006-341X.2000.00455.x [Accessed:  
21 399 20th January 2021]  
22 400 33. Guyatt GH, Oxman AD, Vist GE, Kunz R, Falck-Ytter Y, Alonso-Coello P, et al.  
23 401 GRADE: an emerging consensus on rating quality of evidence and strength of  
24 402 recommendations. *BMJ*. [Online] 2008;336(7650): 924–926. Available from:  
25 403 doi:10.1136/bmj.39489.470347.AD  
26 404 34. Warren LR, Harrison M, Arora S, Darzi A. Working with patients and the public to design  
27 405 an electronic health record interface: A qualitative mixed-methods study. *BMC Medical*  
28 406 *Informatics and Decision Making*. [Online] BMC Medical Informatics and Decision  
29 407 Making; 2019;19(1): 1–8. Available from: doi:10.1186/s12911-019-0993-7  
30 408

**PRISMA-P (Preferred Reporting Items for Systematic review and Meta-Analysis Protocols) 2015 checklist: recommended items to address in a systematic review protocol\***

| Section and topic                 | Item No. | Checklist item                                                                                                                                                                                                                | Reported on Page No. |
|-----------------------------------|----------|-------------------------------------------------------------------------------------------------------------------------------------------------------------------------------------------------------------------------------|----------------------|
| <b>ADMINISTRATIVE INFORMATION</b> |          |                                                                                                                                                                                                                               |                      |
| Title:                            |          |                                                                                                                                                                                                                               |                      |
| Identification                    | 1a       | Identify the report as a protocol of a systematic review                                                                                                                                                                      | 1                    |
| Update                            | 1b       | If the protocol is for an update of a previous systematic review, identify as such                                                                                                                                            | N/A                  |
| Registration                      | 2        | If registered, provide the name of the registry (such as PROSPERO) and registration number                                                                                                                                    | 3                    |
| Authors:                          |          |                                                                                                                                                                                                                               |                      |
| Contact                           | 3a       | Provide name, institutional affiliation, e-mail address of all protocol authors; provide physical mailing address of corresponding author                                                                                     | 1                    |
| Contributions                     | 3b       | Describe contributions of protocol authors and identify the guarantor of the review                                                                                                                                           | 1                    |
| Amendments                        | 4        | If the protocol represents an amendment of a previously completed or published protocol, identify as such and list changes; otherwise, state plan for documenting important protocol amendments                               | N/A                  |
| Support:                          |          |                                                                                                                                                                                                                               |                      |
| Sources                           | 5a       | Indicate sources of financial or other support for the review                                                                                                                                                                 | 8                    |
| Sponsor                           | 5b       | Provide name for the review funder and/or sponsor                                                                                                                                                                             | 8                    |
| Role of sponsor or funder         | 5c       | Describe roles of funder(s), sponsor(s), and/or institution(s), if any, in developing the protocol                                                                                                                            | 8                    |
| <b>INTRODUCTION</b>               |          |                                                                                                                                                                                                                               |                      |
| Rationale                         | 6        | Describe the rationale for the review in the context of what is already known                                                                                                                                                 | 4-5                  |
| Objectives                        | 7        | Provide an explicit statement of the question(s) the review will address with reference to participants, interventions, comparators, and outcomes (PICO)                                                                      | 5                    |
| <b>METHODS</b>                    |          |                                                                                                                                                                                                                               |                      |
| Eligibility criteria              | 8        | Specify the study characteristics (such as PICO, study design, setting, time frame) and report characteristics (such as years considered, language, publication status) to be used as criteria for eligibility for the review | 5-6                  |
| Information sources               | 9        | Describe all intended information sources (such as electronic databases, contact with study authors, trial registers or other grey literature sources) with planned dates of coverage                                         | 5                    |
| Search strategy                   | 10       | Present draft of search strategy to be used for at least one electronic database, including planned limits, such that it could be repeated                                                                                    | 5                    |



|                                    |     |                                                                                                                                                                                                                                                  |     |
|------------------------------------|-----|--------------------------------------------------------------------------------------------------------------------------------------------------------------------------------------------------------------------------------------------------|-----|
| Study records:                     |     |                                                                                                                                                                                                                                                  |     |
| Data management                    | 11a | Describe the mechanism(s) that will be used to manage records and data throughout the review                                                                                                                                                     | 6-7 |
| Selection process                  | 11b | State the process that will be used for selecting studies (such as two independent reviewers) through each phase of the review (that is, screening, eligibility and inclusion in meta-analysis)                                                  | 6   |
| Data collection process            | 11c | Describe planned method of extracting data from reports (such as piloting forms, done independently, in duplicate), any processes for obtaining and confirming data from investigators                                                           | 6-7 |
| Data items                         | 12  | List and define all variables for which data will be sought (such as PICO items, funding sources), any pre-planned data assumptions and simplifications                                                                                          | 6   |
| Outcomes and prioritization        | 13  | List and define all outcomes for which data will be sought, including prioritization of main and additional outcomes, with rationale                                                                                                             | 6   |
| Risk of bias in individual studies | 14  | Describe anticipated methods for assessing risk of bias of individual studies, including whether this will be done at the outcome or study level, or both; state how this information will be used in data synthesis                             | 6-7 |
| Data synthesis                     | 15a | Describe criteria under which study data will be quantitatively synthesised                                                                                                                                                                      | 6-7 |
|                                    | 15b | If data are appropriate for quantitative synthesis, describe planned summary measures, methods of handling data and methods of combining data from studies, including any planned exploration of consistency (such as $I^2$ , Kendall's $\tau$ ) | 7   |
|                                    | 15c | Describe any proposed additional analyses (such as sensitivity or subgroup analyses, meta-regression)                                                                                                                                            | -   |
|                                    | 15d | If quantitative synthesis is not appropriate, describe the type of summary planned                                                                                                                                                               | 7   |
| Meta-bias(es)                      | 16  | Specify any planned assessment of meta-bias(es) (such as publication bias across studies, selective reporting within studies)                                                                                                                    | 6-7 |
| Confidence in cumulative evidence  | 17  | Describe how the strength of the body of evidence will be assessed (such as GRADE)                                                                                                                                                               | 7   |

**\* It is strongly recommended that this checklist be read in conjunction with the PRISMA-P Explanation and Elaboration (cite when available) for important clarification on the items. Amendments to a review protocol should be tracked and dated. The copyright for PRISMA-P (including checklist) is held by the PRISMA-P Group and is distributed under a Creative Commons Attribution Licence 4.0.**

*From: Shamseer L, Moher D, Clarke M, Ghersi D, Liberati A, Petticrew M, Shekelle P, Stewart L, PRISMA-P Group. Preferred reporting items for systematic review and meta-analysis protocols (PRISMA-P) 2015: elaboration and explanation. BMJ. 2015 Jan 2;349(jan02 1):g7647.*

# BMJ Open

## Electronic Health Records, Interoperability, and Patient Safety in Health Systems of High-Income Countries: A Systematic Review Protocol

|                                 |                                                                                                                                                                                                                                                                                                                                                                                                                                                                                                                                                                                                                                                                                                                                                                                                                                                                                                                                                                                                                                                                                                                                                                                                                       |
|---------------------------------|-----------------------------------------------------------------------------------------------------------------------------------------------------------------------------------------------------------------------------------------------------------------------------------------------------------------------------------------------------------------------------------------------------------------------------------------------------------------------------------------------------------------------------------------------------------------------------------------------------------------------------------------------------------------------------------------------------------------------------------------------------------------------------------------------------------------------------------------------------------------------------------------------------------------------------------------------------------------------------------------------------------------------------------------------------------------------------------------------------------------------------------------------------------------------------------------------------------------------|
| Journal:                        | <i>BMJ Open</i>                                                                                                                                                                                                                                                                                                                                                                                                                                                                                                                                                                                                                                                                                                                                                                                                                                                                                                                                                                                                                                                                                                                                                                                                       |
| Manuscript ID                   | bmjopen-2020-044941.R2                                                                                                                                                                                                                                                                                                                                                                                                                                                                                                                                                                                                                                                                                                                                                                                                                                                                                                                                                                                                                                                                                                                                                                                                |
| Article Type:                   | Protocol                                                                                                                                                                                                                                                                                                                                                                                                                                                                                                                                                                                                                                                                                                                                                                                                                                                                                                                                                                                                                                                                                                                                                                                                              |
| Date Submitted by the Author:   | 27-May-2021                                                                                                                                                                                                                                                                                                                                                                                                                                                                                                                                                                                                                                                                                                                                                                                                                                                                                                                                                                                                                                                                                                                                                                                                           |
| Complete List of Authors:       | <p>Li, Edmond; Imperial College London, Patient Safety Translational Research Centre, Institute of Global Health Innovation, Department of Surgery &amp; Cancer; London School of Hygiene and Tropical Medicine Faculty of Infectious and Tropical Diseases, Clinical Research Department</p> <p>Clarke, Jonathan; Imperial College London, Patient Safety Translational Research Centre, Institute of Global Health Innovation, Department of Surgery &amp; Cancer; Imperial College London, Centre for Mathematics of Precision Healthcare</p> <p>Neves, Ana Luisa; Imperial College London, Patient Safety Translational Research Centre, Institute of Global Health Innovation, Department of Surgery &amp; Cancer; University of Porto, Center for Health Technology and Services Research / Department of Community Medicine, Health Information and Decision</p> <p>Ashrafian, Hutan; Imperial College London, Patient Safety Translational Research Centre, Institute of Global Health Innovation, Department of Surgery &amp; Cancer</p> <p>Darzi, Ara; Imperial College London, Patient Safety Translational Research Centre, Institute of Global Health Innovation, Department of Surgery &amp; Cancer</p> |
| <b>Primary Subject Heading</b>: | Health informatics                                                                                                                                                                                                                                                                                                                                                                                                                                                                                                                                                                                                                                                                                                                                                                                                                                                                                                                                                                                                                                                                                                                                                                                                    |
| Secondary Subject Heading:      | Health policy, Public health, Health services research                                                                                                                                                                                                                                                                                                                                                                                                                                                                                                                                                                                                                                                                                                                                                                                                                                                                                                                                                                                                                                                                                                                                                                |
| Keywords:                       | Health informatics < BIOTECHNOLOGY & BIOINFORMATICS, Telemedicine < BIOTECHNOLOGY & BIOINFORMATICS, Information technology < BIOTECHNOLOGY & BIOINFORMATICS, Information management < BIOTECHNOLOGY & BIOINFORMATICS, HEALTH SERVICES ADMINISTRATION & MANAGEMENT, Health policy < HEALTH SERVICES ADMINISTRATION & MANAGEMENT                                                                                                                                                                                                                                                                                                                                                                                                                                                                                                                                                                                                                                                                                                                                                                                                                                                                                        |
|                                 |                                                                                                                                                                                                                                                                                                                                                                                                                                                                                                                                                                                                                                                                                                                                                                                                                                                                                                                                                                                                                                                                                                                                                                                                                       |

SCHOLARONE™  
Manuscripts





I, the Submitting Author has the right to grant and does grant on behalf of all authors of the Work (as defined in the below author licence), an exclusive licence and/or a non-exclusive licence for contributions from authors who are: i) UK Crown employees; ii) where BMJ has agreed a CC-BY licence shall apply, and/or iii) in accordance with the terms applicable for US Federal Government officers or employees acting as part of their official duties; on a worldwide, perpetual, irrevocable, royalty-free basis to BMJ Publishing Group Ltd ("BMJ") its licensees and where the relevant Journal is co-owned by BMJ to the co-owners of the Journal, to publish the Work in this journal and any other BMJ products and to exploit all rights, as set out in our [licence](#).

The Submitting Author accepts and understands that any supply made under these terms is made by BMJ to the Submitting Author unless you are acting as an employee on behalf of your employer or a postgraduate student of an affiliated institution which is paying any applicable article publishing charge ("APC") for Open Access articles. Where the Submitting Author wishes to make the Work available on an Open Access basis (and intends to pay the relevant APC), the terms of reuse of such Open Access shall be governed by a Creative Commons licence – details of these licences and which [Creative Commons](#) licence will apply to this Work are set out in our licence referred to above.

Other than as permitted in any relevant BMJ Author's Self Archiving Policies, I confirm this Work has not been accepted for publication elsewhere, is not being considered for publication elsewhere and does not duplicate material already published. I confirm all authors consent to publication of this Work and authorise the granting of this licence.

# 1 **Electronic Health Records, Interoperability, and Patient Safety in** 2 **Health Systems of High-Income Countries: A Systematic Review** 3 **Protocol**

4 Edmond Li<sup>[1]</sup>, Jonathan Clarke<sup>[1,3]</sup>, Ana Luisa Neves<sup>[1,2]</sup>, Hutan Ashrafian<sup>[1]</sup>, Ara Darzi<sup>[1]</sup>

5 <sup>[1]</sup>Imperial NIHR Patient Safety Translational Research Centre (PSTRC), Institute of Global  
6 Health Innovation (IGHI), Imperial College London, London, United Kingdom

7 <sup>[2]</sup> Department of Community Medicine, Information and Health Decision Sciences (MEDCIDS)  
8 / Center for Health Technology and Services Research (CINTESIS), University of Porto, Porto,  
9 Portugal.

10 <sup>[3]</sup> Centre for Mathematics of Precision Healthcare, Imperial College London, London, United  
11 Kingdom

## 31 **Corresponding author**

32 Name: Edmond Li

33 Email: [edmond.li19@imperial.ac.uk](mailto:edmond.li19@imperial.ac.uk)

34 Address: Institute of Global Health Innovation, Room 1035/7, QEQM Wing, St Mary's Campus,  
35 London W2 1NY

36 **Keywords [MeSH terms]:** electronic health records, electronic medical records, computerised  
37 patient records, health information technology, health information exchanges, interoperability,  
38 patient safety, patient harm, adverse events, health outcomes

39 **Word count:** 2752

## 41 Abstract

### 42 Introduction

43 The availability and routine use of electronic health records (EHRs) have become commonplace  
44 in healthcare systems of many high-income countries. While there is an ever-growing body of  
45 literature pertaining to EHR use, evidence surrounding the importance of EHR interoperability  
46 and its impact on patient safety remains less clear. There is therefore a need and opportunity to  
47 evaluate the evidence available regarding this relationship so as to better inform health  
48 informatics development and policies in the years to come.

### 50 Objective

51 This systematic review aims to evaluate the impact of EHR interoperability on patient safety in  
52 health systems of high-income countries.

### 54 Methods and analysis

55 A systematic literature review will be conducted via a computerised search through four  
56 databases: PubMed, Embase, HMIC, and PsycInfo for relevant articles published between 2010  
57 and 2020. Outcomes of interest will include: impact on patient safety, and the broader effects on  
58 health systems. Quality of the randomised quantitative studies will be assessed using Cochrane  
59 Risk of Bias Tool. Non-randomised papers will be evaluated with the Risk of Bias In Non-  
60 Randomised Studies - of Interventions (ROBINS-I) tool. Drummond's Checklist will be utilised  
61 for publications pertaining to economic evaluation. The National Institute for Health and Care  
62 Excellence (NICE) quality appraisal checklist will be used to assess qualitative studies. A  
63 narrative synthesis will be conducted for included studies, and the body of evidence will be  
64 summarised in a summary of findings table.

### 66 Ethics and dissemination

67 This review will summarise published studies with non-identifiable data and therefore does not  
68 require ethical approval. This protocol complies with the Preferred Reporting Items for  
69 Systematic Review and Meta-Analyses Protocols guidelines. Findings will be disseminated  
70 through preprints, open access peer-reviewed publication, and conference presentations. Patients  
71 or members of the public were not involved in the design of this study.

## 73 Article Summary

### 74 Strengths and limitations of this study

#### 75 Strengths

- 76 • Inclusion of quantitative, qualitative, and mixed-methods studies can provide a  
77 comprehensive overview of the multitude of ways in which interoperable EHRs may  
78 affect patient safety and health systems.
- 79 • The proposed review attempts to answer a pragmatic question which is integral to  
80 influencing future health informatics development and policies.

#### 82 Limitations

- 83 • The heterogeneity of methods and outcomes assessed may obscure the true effect  
84 interoperable EHRs have had on patient safety in the clinical setting.

- 1  
2  
3 85 • Potential small sample size in subgroup analyses, may negatively impact the statistical  
4 86 power in quantitative data synthesis.  
5 87 • Limiting the search strategy to English-only publications may not capture studies  
6 88 exploring the EHR interoperability experiences of health systems in non-English  
7 89 speaking countries.  
8 90

9 91 [PROSPERO registration number \[CRD42020209285\]](#)

10 92 This is an open access article distributed in accordance with the Creative Commons Attribution  
11 93 4.0 Unported (CC BY 4.0) license, which permits others to copy, redistribute, remix, transform  
12 94 and build upon this work for any purpose, provided the original work is properly cited, a link to  
13 95 the licence is given, and indication of whether changes were made. See:  
14 96 <https://creativecommons.org/licenses/by/4.0/>.

## 97 Introduction

98 Electronic health records (EHRs) have become an integral part of modern healthcare since their  
99 initial mainstream implementation in the mid-late 2000s through the passing of the Health  
100 Information Technology for Economic and Clinical Health Act (HITECH) in the United States  
101 and the NHS National Programme for IT initiative (NPfIT) in England (1–4). From the  
102 documentation & retrieval of patient records and the prescription of medications, to coordinating  
103 complex care plans between different healthcare providers and electronic billing, EHRs fulfil a  
104 multitude of roles for both clinicians and patients alike (5–9).

105  
106 In order to achieve EHR's full potential, it is critical to improve interoperability - i.e., “*the ability*  
107 *of health information systems to work together within and across organisation boundaries in*  
108 *order to advance effective delivery of healthcare for individuals and communities*” (10). The lack  
109 of universal interoperability is often cited as one of the many significant shortcomings of EHRs  
110 currently in use, resulting in duplication in healthcare costs, increased clinician workload fatigue,  
111 and poses a potential risk to patient safety (2). This is especially problematic for patient  
112 populations with chronic conditions, polypharmacy, and multiple comorbidities who are reliant  
113 upon effective patient information sharing via EHRs to facilitate their care (11).

114  
115 Poor EHR interoperability is detrimental to patient safety and costly for health systems. Its  
116 consequences range from increased risks of medication errors, fragmentation of patient data, to  
117 iatrogenic harm resulting from redundant testing, and additional healthcare expenditure (12–17).  
118 In the fragmented EHR landscape of the United Kingdom, measuring the effect poor EHR  
119 interoperability has in the National Health Service (NHS), remain challenging (18). Although  
120 there is a growing body of literature investigating areas such as the facilitators and barriers to  
121 EHR greater adoption, technical capabilities, and usability (19,20), no systematic review has  
122 been conducted exploring specifically the problem of interoperability amongst the assortment of  
123 EHRs in use, how it affects patient safety, and ultimately the financial cost savings lost to health  
124 systems.

125  
126 In a recent systematic review by Dobrow *et al.* assessing the effects of EHR and HIT  
127 interoperability on health systems, 130 publications were included, with the majority being  
128 studies conducted in the United States, utilised quantitative methods, and focussed primarily on  
129 acute healthcare settings. The authors noted the use of interoperable EHRs had a positive impact  
130 on outcomes measures such as quality of care and productivity (19). However, in domains such  
131 as stakeholder engagement, performance & reliability, security & privacy, information quality,  
132 and ease of use, the benefits of interoperable EHRs was less clear (19). Amongst the 130  
133 publications, 17 were reviews with the majority directed at exploring facilitators & barriers to  
134 EHR implementation, and the general benefits and impact of EHR use. While this review did  
135 focus on studies pertaining to the topic of interoperable EHRs, this was done so only from a  
136 broad perspective and included studies exploring a wide range of outcomes related to the effects  
137 of EHR on healthcare rather than specifically on their implications to patient safety.

138  
139 In another review by Hersh *et al.*, the authors explored how health information exchange (HIE)  
140 affected health systems on a variety of domains, including costs, healthcare utilisation, health

141 outcomes, healthcare worker attitudes, and sustainability. Despite the widespread routinely use  
 142 of HIE, the authors described a general lack of robust evidence on the quality, costs, efficiency,  
 143 usage, and sustainability (21). However, there was some evidence demonstrating HIEs being  
 144 associated with reduced utilisation and costs in emergency care settings despite methodological  
 145 issues being present in many of the included publications (21). Although this review was  
 146 ambitious in the wide scope of interest regarding the effects of HIE use, patient safety was not a  
 147 primary topic of focus. Another limitation of this study was that it only contained US-based  
 148 publications, and thus findings lack generalisability internationally to other health systems in  
 149 high-income countries (HIC) which are both organised, financed differently.

## 150 Research aim

151 The overall aim of this literature review is to explore how EHR interoperability impacts patient  
 152 safety, in the context of health systems in HICs. The results generated will aim to inform  
 153 healthcare policymakers and help shape more effective EHR system implementation and  
 154 modernisation efforts in the coming years.

## 155 Methods and analysis

### 156 Search strategy

157 A computerised search of the literature published in the last 10 years (2010 to 2020) search will  
 158 be performed on PubMed/Medline, Embase, Cumulative Index to Nursing and Allied Health  
 159 Literature (CINAHL), Health Management Information Consortium (HMIC), and PsycInfo. This  
 160 publication timeframe was chosen as it coincides with the mainstream implementation of EHRs  
 161 in several HIC healthcare systems such as Kaiser Permanente in the US, and thus would select  
 162 for the most up to date, relevant evidence concerning EHR interoperability and patient safety  
 163 challenges faced by healthcare systems today to be included (22,23). The list of search strings  
 164 used will include both free text and controlled terms, whenever supported (Table 1) and will be  
 165 iteratively refined in consultation with the Imperial College St. Mary's campus medical librarian.

166 Grey literature sources will also be searched, including registrations in the International  
 167 Prospective Register of Systematic Reviews, reports of relevant stakeholder organisations (NHS  
 168 England, American Medical Informatics Association (AMIA), eHealth at WHO, and conference  
 169 proceedings (last 5 years) of several related conferences (AMIA, MedInfo, Medicine 2.0,  
 170 Medicine X)), in order to identify possible additional studies that meet the inclusion criteria.

171 The search has also been restricted to HIC and articles published in English only.

172 *Table 1: Concepts and database search terms*

| Electronic health records                                                                                                                                           |            | Interoperability                                                                                                                                   |            | Patient safety                                                                                                                                                       |
|---------------------------------------------------------------------------------------------------------------------------------------------------------------------|------------|----------------------------------------------------------------------------------------------------------------------------------------------------|------------|----------------------------------------------------------------------------------------------------------------------------------------------------------------------|
| <ul style="list-style-type: none"> <li>● Electronic health records</li> <li>● Electronic medical records</li> <li>● Computerised medical records systems</li> </ul> | <b>AND</b> | <ul style="list-style-type: none"> <li>● Interoperability</li> <li>● Health information interoperability</li> <li>● Systems integration</li> </ul> | <b>AND</b> | <ul style="list-style-type: none"> <li>● Patient safety</li> <li>● Patient adj1 incident*</li> <li>● Adverse adj1 event*</li> <li>● Patient adj1 outcome*</li> </ul> |

|                                                                                                                                                                                                                                                |  |  |  |                                                                                                  |
|------------------------------------------------------------------------------------------------------------------------------------------------------------------------------------------------------------------------------------------------|--|--|--|--------------------------------------------------------------------------------------------------|
| <ul style="list-style-type: none"> <li>● Health information exchange / HIE</li> <li>● Health information technology / HIT</li> <li>● Hospital information systems</li> <li>● Medical informatics</li> <li>● Medical records linkage</li> </ul> |  |  |  | <ul style="list-style-type: none"> <li>● Patient adj1 harm</li> <li>● Risk management</li> </ul> |
|------------------------------------------------------------------------------------------------------------------------------------------------------------------------------------------------------------------------------------------------|--|--|--|--------------------------------------------------------------------------------------------------|

173

### 174 Study selection criteria

175 A summary of the population, intervention, comparison, outcomes, and type of studies being  
 176 considered is provided in **Table 2**. This systematic review will focus on studies performed in  
 177 high-income countries and published in English only. High-income countries will be defined in  
 178 accordance with the World Bank's definition of "*countries where the gross national income*  
 179 *(GNI) per capita is higher than \$12,536 USD*" (24). Studies assessing the impact of EHR  
 180 interoperability will be included. Interventions will include EHR systems interoperable with  
 181 other health information technology systems both within and across healthcare facilities, as well  
 182 as those used in tertiary and community settings. The primary outcomes to be considered in this  
 183 review will be safety outcomes, including adverse events/incidents, safety-related patient  
 184 experiences, and health outcomes. In addition, secondary outcomes would include studies  
 185 exploring the broader impact of interoperable EHRs on health systems such as cost effectiveness  
 186 and clinical culture amongst healthcare providers on the topic Quantitative, qualitative, and  
 187 mixed methods studies will be included. Reference lists of the selected articles will also be  
 188 screened for papers which may have been missed by the initial database search but still meet the  
 189 eligibility criteria.

190

191 *Table 2: PICO inclusion criteria*

|                     |                                                           |
|---------------------|-----------------------------------------------------------|
| <i>Population</i>   | High-income countries utilising electronic health records |
| <i>Intervention</i> | EHRs with interoperability                                |
| <i>Comparison</i>   | Usual care (i.e., existing baseline of interoperability)  |
| <i>Outcome</i>      | Impact on patient safety and quality of care              |

### 192 Screening

193 Articles to be included will be screened by two independent reviewers, following the process  
 194 described in the Preferred Reporting Items for Systematic Reviews and Meta-Analyses  
 195 (PRISMA) flow diagram (25). The initial screening will be done by the first reviewer based on  
 196 the publication titles, followed by a second screening based on the abstracts. Included abstracts  
 197 will then be fully reviewed by two independent researchers to produce a unified selection of  
 198 articles to be included in this review. Cohen's kappa will be calculated to ensure inter-rater  
 199 agreement and consistency in the selection of studies to be included (26,27). Any disagreements



1  
2  
3 200 will be resolved by consensus; if a Cohen's kappa value of less than 0.6 is reported, the  
4 201 discrepancies will be addressed through discussions with a more experienced third investigator.

## 6 202 Data extraction

7 203 Data extraction will be performed using a standardised extraction table for each of the two  
8 204 investigators to summarise the characteristics and findings of each included study, including  
9 205 name of the first author, year of publication, study design, number of participants, retention rates,  
10 206 setting characteristics, outcome measures, and main results. The content of the two summary  
11 207 tables will then be aggregated and reviewed once more by both investigators, with any  
12 208 disagreements being solved by the third senior investigator.  
13 209

## 15 210 Quality assessment

16 211 The quality of randomised controlled trials and cluster randomised trials will be assessed using  
17 212 the Cochrane Risk of Bias Tool (28), and the quality of non-randomised intervention studies (i.e.,  
18 213 case control, cohort, quasi-experimental) will be appraised using the 'Risk of Bias In Non-  
19 214 Randomised Studies - of Interventions' (ROBINS-I) tool (29). For cost-effectiveness studies, the  
20 215 Drummond's checklist for assessing economic evaluations will be used (30). The National  
21 216 Institute for Health and Care Excellence (NICE) quality appraisal checklist will be utilised to  
22 217 assess the selected qualitative studies (31). Two independent reviewers will score the selected  
23 218 studies and any disagreements will be resolved by a third person. A risk of bias table along with  
24 219 an overall, collective bias narrative will be produced to summarise the biases of outcomes  
25 220 observed amongst the evaluated studies.  
26 221

## 29 222 Narrative synthesis, subgroup analysis, and meta-analysis

30 223 A narrative synthesis will be performed for all studies included in this systematic review to  
31 224 summarise any salient findings observed (32).  
32 225

33 226 In quantitative studies with homogenous or comparable outcome measures, whenever possible,  
34 227 continuous and dichotomous outcomes will be pooled together in a meta-analysis. If possible,  
35 228 effect sizes will be transformed in a common metric (Hedges'  $g$  – the bias-corrected standardised  
36 229 difference in means) and classified as positive when in favour of the intervention. Heterogeneity  
37 230 will be assessed using  $I^2$  and the presence of publication bias will be evaluated using a funnel  
38 231 plot and the Duval and Tweedie's trim and fill method (33).  
39 232

40 233 For both qualitative and quantitative studies that report comparable outcomes, a subgroup  
41 234 analysis based on clinical settings (e.g., primary vs. secondary healthcare settings) will be  
42 235 conducted to explore any patterns or relationships ascertained from the data. Through a  
43 236 standardised spreadsheet shared amongst the reviewers, the body of evidence will be organised  
44 237 in two separate Summary of Findings tables (for both qualitative and quantitative studies) in  
45 238 accordance to the 'Grading of Recommendations Assessment, Development and Evaluation'  
46 239 (GRADE) criteria (34).  
47 240

## 51 241 Patient and public involvement

52 242 This systematic literature review saw no direct participation by patients or the public during the  
53 243 design of this study. However, this study was designed following a series of structured  
54 244 interviews with patients regarding their experience of attending multiple institutions for hospital  
55  
56  
57  
58  
59



245 care (35). As this literature review will be used to form the basis for subsequent studies exploring  
246 the topic including ones involving patients, findings from this review will be shared with patient  
247 research groups to gain feedback and encourage further discourse surrounding the topic of EHR  
248 interoperability and patient safety.

## 250 Amendments

251 Any amendments to this protocol will be documented with reference to saved searches and  
252 analysis methods, which will be recorded in bibliographic databases, Mendeley and Excel  
253 templates for data collection and synthesis.

## 254 Discussion

255 One of the primary strengths stemming from the almost exploratory nature of this systematic  
256 review is the ability to generate a succinct, comprehensive appraisal of the best evidence  
257 currently available regarding how EHR interoperability impacts patient care and safety. By  
258 publishing this review protocol beforehand, we demonstrate a clear, robust, and transparent  
259 approach to aggregating the anticipated assortment of literature on the subject in question.

260  
261 There are also some limitations to be acknowledged. By restricting the inclusion criteria to  
262 publications made in English only, this could potentially exclude relevant papers pertaining to  
263 interoperable EHR systems in non-English healthcare settings. However, this is expected to be  
264 minimal as the majority of the papers concerning this topic published from the United States and  
265 European countries and are primarily done so in English journals. It must also be noted that both  
266 the heterogeneity of measures and outcomes evaluated, as well as the potentially reduced number  
267 of studies in subgroup analyses, may negatively influence the statistical power in data synthesis,  
268 and may preclude pooling of data as a meta-analysis. With such diverse means of measuring and  
269 assessing the effects of EHR interoperability, this will likely make comparisons between studies  
270 difficult and may obscure the true measure of effect EHR interoperability has had in the clinical  
271 setting. To mitigate this risk, outcomes will be grouped whenever possible, and summarised as a  
272 narrative synthesis. However, this can also represent a strength, as it will provide a  
273 comprehensive overview on the subject, capitalising on various research methodologies and  
274 providing novel insights on the impact of interoperable EHR systems on patient safety.

## 275 Acknowledgments

276 We would like to thank Michael Gainsford (Library Manager and Liaison Librarian at Imperial  
277 College London) for his support and guidance provided to improve the composition of the search  
278 terms and procedural aspects of the overall search strategy.

## 279 Authors' contributions

280 Conception and design of the work: EL, ALN, and JC wrote the manuscript. HA, and AD  
281 provided critical revision of drafts for important intellectual content. All authors provided input  
282 into drafts of the manuscript and agree on the contents of the final version.

## 283 Funding statement

284 This research was supported through the Imperial College National Institute for Health Research  
285 (NIHR) Patient Safety Translational Research Centre (PSTRC) and the Imperial College

1  
2  
3 286 Biomedical Research Centre (BRC). JC acknowledges support from the Wellcome Trust  
4 287 [215938/Z/19/Z]. However, the funder/sponsor has had no role in development and drafting of  
5 288 this protocol.  
6

## 7 289 **Competing Interests**

8 290 The authors declare that there are no competing interests.  
9  
10  
11  
12  
13  
14  
15  
16  
17  
18  
19  
20  
21  
22  
23  
24  
25  
26  
27  
28  
29  
30  
31  
32  
33  
34  
35  
36  
37  
38  
39  
40  
41  
42  
43  
44  
45  
46  
47  
48  
49  
50  
51  
52  
53  
54  
55  
56  
57  
58  
59  
60

For peer review only

## References

1. Colicchio TK, Cimino JJ, Del Fiol G. Unintended consequences of nationwide electronic health record adoption: Challenges and opportunities in the post-meaningful use era. *Journal of Medical Internet Research*. [Online] 2019;21(6): 1–9. Available from: doi:10.2196/13313
2. Roman LC, Ancker JS, Johnson SB, Senathirajah Y. Navigation in the electronic health record: A review of the safety and usability literature. *Journal of Biomedical Informatics*. [Online] Elsevier Inc.; 2017;67: 69–79. Available from: doi:10.1016/j.jbi.2017.01.005
3. Justinia T. The UK’s National Programme for IT: Why was it dismantled? *Health Services Management Research*. [Online] 2017;30(1): 2–9. Available from: doi:10.1177/0951484816662492
4. Wachter RM. Making IT work : harnessing the power of health IT to improve care in England. *National Advisory Group on Health Information Technology in England*. [Online] 2016; 71. Available from: [https://www.gov.uk/government/uploads/system/uploads/attachment\\_data/file/550866/Wachter\\_Review\\_Accessible.pdf](https://www.gov.uk/government/uploads/system/uploads/attachment_data/file/550866/Wachter_Review_Accessible.pdf)  
[https://assets.publishing.service.gov.uk/government/uploads/system/uploads/attachment\\_data/file/550866/Wachter\\_Review\\_Accessible.pdf](https://assets.publishing.service.gov.uk/government/uploads/system/uploads/attachment_data/file/550866/Wachter_Review_Accessible.pdf)
5. Kruse CS, Kristof C, Jones B, Mitchell E, Martinez A. Barriers to Electronic Health Record Adoption: a Systematic Literature Review. *Journal of Medical Systems*. [Online] *Journal of Medical Systems*; 2016;40(12). Available from: doi:10.1007/s10916-016-0628-9
6. Ayaad O, Alloubani A, ALhajaa EA, Farhan M, Abuseif S, Al Hroub A, et al. The role of electronic medical records in improving the quality of health care services: Comparative study. *International Journal of Medical Informatics*. [Online] Elsevier; 2019;127(April): 63–67. Available from: doi:10.1016/j.ijmedinf.2019.04.014
7. Evans RS. Electronic Health Records: Then, Now, and in the Future. *Yearbook of Medical Informatics*. [Online] 2016;25(S 01): S48–S61. Available from: doi:10.15265/IYS-2016-s006
8. Gagnon MP, Payne-Gagnon J, Breton E, Fortin JP, Khoury L, Dolovich L, et al. Adoption of electronic personal health records in Canada: Perceptions of stakeholders. *International Journal of Health Policy and Management*. [Online] 2016;5(7): 425–433. Available from: doi:10.15171/ijhpm.2016.36
9. Campanella P, Lovato E, Marone C, Fallacara L, Mancuso A, Ricciardi W, et al. The impact of electronic health records on healthcare quality: a systematic review and meta-analysis. *The European Journal of Public Health*. [Online] 2016;26(1): 60–64. Available from: doi:10.1093/eurpub/ckv122
10. Reis ZSN, Maia TA, Marcolino MS, Becerra-Posada F, Novillo-Ortiz D, Ribeiro ALP. Is There Evidence of Cost Benefits of Electronic Medical Records, Standards, or Interoperability in Hospital Information Systems? Overview of Systematic Reviews. *JMIR Medical Informatics*. [Online] 2017;5(3): e26. Available from: doi:10.2196/medinform.7400
11. World Health Organization (WHO). *eHealth in the Region of the Americas: breaking down the barriers to implementation*. [Online] 2016. Available from: <http://iris.paho.org/xmlui/bitstream/handle/123456789/31286/9789275119259-eng.pdf?sequence=6&isAllowed=y>
12. Zaheer S, Pimentel SD, Simmons KD, Kuo LE, Datta J, Williams N, et al. Comparing

- 1  
2  
3 337 International and United States Undergraduate Medical Education and Surgical Outcomes  
4 338 Using a Refined Balance Matching Methodology. *Annals of Surgery*. [Online] 2017;  
5 339 Available from: doi:10.1097/SLA.0000000000001878
- 6 340 13. Everson J, Adler-Milstein J. Gaps in health information exchange between hospitals that  
7 341 treat many shared patients. *Journal of the American Medical Informatics Association*.  
8 342 [Online] 2018;25(9): 1114–1121. Available from: doi:10.1093/jamia/ocy089
- 9 343 14. Thompson MP, Graetz I. Hospital adoption of interoperability functions. *Healthcare*.  
10 344 [Online] Elsevier Inc.; 2019;7(3): 100347. Available from:  
11 345 doi:10.1016/j.hjdsi.2018.12.001
- 12 346 15. Tapuria A, Kalra D, Kobayashi S. Contribution of clinical archetypes, and the challenges,  
13 347 towards achieving semantic interoperability for EHRs. *Healthcare Informatics Research*.  
14 348 [Online] 2013;19(4): 286–292. Available from: doi:10.4258/hir.2013.19.4.286
- 15 349 16. Warren LR, Clarke JM, Arora S, Darzi AW. Improving data sharing between acute  
16 350 hospitals in England: an overview of health record system distribution and retrospective  
17 351 observational analysis of inter-hospital transitions of care. *BMJ Open*. [Online]  
18 352 2019;9(12): e031637. Available from: doi:10.1136/bmjopen-2019-031637
- 19 353 17. Clarke JM, Warren LR, Arora S, Barahona M, Darzi AW. Guiding interoperable  
20 354 electronic health records through patient-sharing networks. *npj Digital Medicine*. [Online]  
21 355 Springer US; 2018;1(1): 1–6. Available from: doi:10.1038/s41746-018-0072-y
- 22 356 18. McAlearney AS, Sieck C, Hefner J, Robbins J, Huerta TR. Facilitating Ambulatory  
23 357 Electronic Health Record System Implementation: Evidence from a Qualitative Study.  
24 358 *BioMed Research International*. [Online] 2013;2013: 1–9. Available from:  
25 359 doi:10.1155/2013/629574
- 26 360 19. Dobrow MJ, Bytautas JP, Tharmalingam S, Hagens S. Interoperable Electronic Health  
27 361 Records and Health Information Exchanges: Systematic Review. *JMIR Medical*  
28 362 *Informatics*. [Online] 2019;7(2): e12607. Available from: doi:10.2196/12607
- 29 363 20. Zahabi M, Kaber DB, Swangnetr M. Usability and Safety in Electronic Medical Records  
30 364 Interface Design: A Review of Recent Literature and Guideline Formulation. *Human*  
31 365 *Factors*. [Online] 2015;57(5): 805–834. Available from: doi:10.1177/0018720815576827
- 32 366 21. Hersh WR, Totten AM, Eden KB, Devine B, Gorman P, Kassakian SZ, et al. Outcomes  
33 367 From Health Information Exchange: Systematic Review and Future Research Needs.  
34 368 *JMIR Medical Informatics*. [Online] 2015;3(4): e39. Available from:  
35 369 doi:10.2196/medinform.5215
- 36 370 22. Wheatley B. Transforming care delivery through health information technology. *The*  
37 371 *Permanente journal*. [Online] Winter; 2013;17(1): 81–86. Available from:  
38 372 doi:10.7812/TPP/12-030 [Accessed: 20th January 2021]
- 39 373 23. Chen C, Permanente K. The Kaiser Permanente Electronic Health Record: Transforming  
40 374 And Streamlining Modalities Of Care. 2009; Available from: doi:10.1377/hlthaff.28.2.323  
41 375 [Accessed: 22nd January 2021]
- 42 376 24. World Bank. *World Bank Country and Lending Groups – World Bank Data Help Desk*.  
43 377 [Online] The World Bank. p. 1–8. Available from:  
44 378 <https://datahelpdesk.worldbank.org/knowledgebase/articles/906519> [Accessed: 26th May  
45 379 2021]
- 46 380 25. Moher D, Liberati A, Tetzlaff J, Altman DG, Altman D, Antes G, et al. Preferred  
47 381 reporting items for systematic reviews and meta-analyses: The PRISMA statement. *PLoS*  
48 382 *Medicine*. [Online] 2009;6(7). Available from: doi:10.1371/journal.pmed.1000097

- 1  
2  
3 383 26. Landis JR, Koch GG. The Measurement of Observer Agreement for Categorical Data.  
4 384 *Biometrics*. [Online] 1977;33(1): 159. Available from: doi:10.2307/2529310  
5 385 27. McHugh ML. Interrater reliability: the kappa statistic. *Biochemia medica*. 2012;22(3):  
6 386 276–282.  
7  
8 387 28. Sterne JAC, Savović J, Page MJ, Elbers RG, Blencowe NS, Boutron I, et al. RoB 2: A  
9 388 revised tool for assessing risk of bias in randomised trials. *The BMJ*. [Online]  
10 389 2019;366(August). Available from: doi:10.1136/bmj.l4898  
11 390 29. Sterne JA, Hernán MA, Reeves BC, Savović J, Berkman ND, Viswanathan M, et al.  
12 391 ROBINS-I: A tool for assessing risk of bias in non-randomised studies of interventions.  
13 392 *BMJ (Online)*. [Online] 2016;355: 4–10. Available from: doi:10.1136/bmj.i4919  
14 393 30. Drummond MF, Brien BJ, Torrance GW, Stoddart GL. *Methods for the Economic*  
15 394 *Evaluation of Health Care Programmes*.. 2nd ed. Oxford University Press; 1997.  
16 395 31. *Methods for the development of NICE public health guidance*. [Online]. 3rd n. National  
17 396 Institute for Clinical Excellence (NICE); 2018. Available from:  
18 397 [https://www.nice.org.uk/process/pmg4/resources/methods-for-the-development-of-nice-](https://www.nice.org.uk/process/pmg4/resources/methods-for-the-development-of-nice-public-health-guidance-third-edition-pdf-2007967445701)  
19 398 [public-health-guidance-third-edition-pdf-2007967445701](https://www.nice.org.uk/process/pmg4/resources/methods-for-the-development-of-nice-public-health-guidance-third-edition-pdf-2007967445701)  
20 399 32. Popay, J., Roberts, H., Sowden, A., Petticrew, M., Arai, L., Rodgers, M., ... & Duffy S.  
21 400 Guidance on the conduct of narrative synthesis in systematic reviews. A product from the  
22 401 ESRC methods programme. 2006;(April 2006): 1–92.  
23 402 33. Duval S, Tweedie R. Trim and fill: A simple funnel-plot-based method of testing and  
24 403 adjusting for publication bias in meta-analysis. *Biometrics*. [Online] Biometric Society;  
25 404 2000;56(2): 455–463. Available from: doi:10.1111/j.0006-341X.2000.00455.x [Accessed:  
26 405 20th January 2021]  
27 406 34. Guyatt GH, Oxman AD, Vist GE, Kunz R, Falck-Ytter Y, Alonso-Coello P, et al.  
28 407 GRADE: an emerging consensus on rating quality of evidence and strength of  
29 408 recommendations. *BMJ*. [Online] 2008;336(7650): 924–926. Available from:  
30 409 doi:10.1136/bmj.39489.470347.AD  
31 410 35. Warren LR, Harrison M, Arora S, Darzi A. Working with patients and the public to design  
32 411 an electronic health record interface: A qualitative mixed-methods study. *BMC Medical*  
33 412 *Informatics and Decision Making*. [Online] BMC Medical Informatics and Decision  
34 413 Making; 2019;19(1): 1–8. Available from: doi:10.1186/s12911-019-0993-7  
35 414  
36  
37  
38  
39  
40  
41  
42  
43  
44  
45  
46  
47  
48  
49  
50  
51  
52  
53  
54  
55  
56  
57  
58  
59  
60

**PRISMA-P (Preferred Reporting Items for Systematic review and Meta-Analysis Protocols) 2015 checklist: recommended items to address in a systematic review protocol\***

| Section and topic                 | Item No. | Checklist item                                                                                                                                                                                                                | Reported on Page No. |
|-----------------------------------|----------|-------------------------------------------------------------------------------------------------------------------------------------------------------------------------------------------------------------------------------|----------------------|
| <b>ADMINISTRATIVE INFORMATION</b> |          |                                                                                                                                                                                                                               |                      |
| Title:                            |          |                                                                                                                                                                                                                               |                      |
| Identification                    | 1a       | Identify the report as a protocol of a systematic review                                                                                                                                                                      | 1                    |
| Update                            | 1b       | If the protocol is for an update of a previous systematic review, identify as such                                                                                                                                            | N/A                  |
| Registration                      | 2        | If registered, provide the name of the registry (such as PROSPERO) and registration number                                                                                                                                    | 3                    |
| Authors:                          |          |                                                                                                                                                                                                                               |                      |
| Contact                           | 3a       | Provide name, institutional affiliation, e-mail address of all protocol authors; provide physical mailing address of corresponding author                                                                                     | 1                    |
| Contributions                     | 3b       | Describe contributions of protocol authors and identify the guarantor of the review                                                                                                                                           | 1                    |
| Amendments                        | 4        | If the protocol represents an amendment of a previously completed or published protocol, identify as such and list changes; otherwise, state plan for documenting important protocol amendments                               | N/A                  |
| Support:                          |          |                                                                                                                                                                                                                               |                      |
| Sources                           | 5a       | Indicate sources of financial or other support for the review                                                                                                                                                                 | 8                    |
| Sponsor                           | 5b       | Provide name for the review funder and/or sponsor                                                                                                                                                                             | 8                    |
| Role of sponsor or funder         | 5c       | Describe roles of funder(s), sponsor(s), and/or institution(s), if any, in developing the protocol                                                                                                                            | 8                    |
| <b>INTRODUCTION</b>               |          |                                                                                                                                                                                                                               |                      |
| Rationale                         | 6        | Describe the rationale for the review in the context of what is already known                                                                                                                                                 | 4-5                  |
| Objectives                        | 7        | Provide an explicit statement of the question(s) the review will address with reference to participants, interventions, comparators, and outcomes (PICO)                                                                      | 5                    |
| <b>METHODS</b>                    |          |                                                                                                                                                                                                                               |                      |
| Eligibility criteria              | 8        | Specify the study characteristics (such as PICO, study design, setting, time frame) and report characteristics (such as years considered, language, publication status) to be used as criteria for eligibility for the review | 5-6                  |
| Information sources               | 9        | Describe all intended information sources (such as electronic databases, contact with study authors, trial registers or other grey literature sources) with planned dates of coverage                                         | 5                    |
| Search strategy                   | 10       | Present draft of search strategy to be used for at least one electronic database, including planned limits, such that it could be repeated                                                                                    | 5                    |



|                                    |     |                                                                                                                                                                                                                                                  |     |
|------------------------------------|-----|--------------------------------------------------------------------------------------------------------------------------------------------------------------------------------------------------------------------------------------------------|-----|
| Study records:                     |     |                                                                                                                                                                                                                                                  |     |
| Data management                    | 11a | Describe the mechanism(s) that will be used to manage records and data throughout the review                                                                                                                                                     | 6-7 |
| Selection process                  | 11b | State the process that will be used for selecting studies (such as two independent reviewers) through each phase of the review (that is, screening, eligibility and inclusion in meta-analysis)                                                  | 6   |
| Data collection process            | 11c | Describe planned method of extracting data from reports (such as piloting forms, done independently, in duplicate), any processes for obtaining and confirming data from investigators                                                           | 6-7 |
| Data items                         | 12  | List and define all variables for which data will be sought (such as PICO items, funding sources), any pre-planned data assumptions and simplifications                                                                                          | 6   |
| Outcomes and prioritization        | 13  | List and define all outcomes for which data will be sought, including prioritization of main and additional outcomes, with rationale                                                                                                             | 6   |
| Risk of bias in individual studies | 14  | Describe anticipated methods for assessing risk of bias of individual studies, including whether this will be done at the outcome or study level, or both; state how this information will be used in data synthesis                             | 6-7 |
| Data synthesis                     | 15a | Describe criteria under which study data will be quantitatively synthesised                                                                                                                                                                      | 6-7 |
|                                    | 15b | If data are appropriate for quantitative synthesis, describe planned summary measures, methods of handling data and methods of combining data from studies, including any planned exploration of consistency (such as $I^2$ , Kendall's $\tau$ ) | 7   |
|                                    | 15c | Describe any proposed additional analyses (such as sensitivity or subgroup analyses, meta-regression)                                                                                                                                            | -   |
|                                    | 15d | If quantitative synthesis is not appropriate, describe the type of summary planned                                                                                                                                                               | 7   |
| Meta-bias(es)                      | 16  | Specify any planned assessment of meta-bias(es) (such as publication bias across studies, selective reporting within studies)                                                                                                                    | 6-7 |
| Confidence in cumulative evidence  | 17  | Describe how the strength of the body of evidence will be assessed (such as GRADE)                                                                                                                                                               | 7   |

**\* It is strongly recommended that this checklist be read in conjunction with the PRISMA-P Explanation and Elaboration (cite when available) for important clarification on the items. Amendments to a review protocol should be tracked and dated. The copyright for PRISMA-P (including checklist) is held by the PRISMA-P Group and is distributed under a Creative Commons Attribution Licence 4.0.**

*From: Shamseer L, Moher D, Clarke M, Ghersi D, Liberati A, Petticrew M, Shekelle P, Stewart L, PRISMA-P Group. Preferred reporting items for systematic review and meta-analysis protocols (PRISMA-P) 2015: elaboration and explanation. BMJ. 2015 Jan 2;349(jan02 1):g7647.*



# BMJ Open

## Electronic Health Records, Interoperability, and Patient Safety in Health Systems of High-Income Countries: A Systematic Review Protocol

|                                 |                                                                                                                                                                                                                                                                                                                                                                                                                                                                                                                                                                                                                                                                                                                                                                                                                                                                                                                                                                                                                                                                                                                                                                                                                       |
|---------------------------------|-----------------------------------------------------------------------------------------------------------------------------------------------------------------------------------------------------------------------------------------------------------------------------------------------------------------------------------------------------------------------------------------------------------------------------------------------------------------------------------------------------------------------------------------------------------------------------------------------------------------------------------------------------------------------------------------------------------------------------------------------------------------------------------------------------------------------------------------------------------------------------------------------------------------------------------------------------------------------------------------------------------------------------------------------------------------------------------------------------------------------------------------------------------------------------------------------------------------------|
| Journal:                        | <i>BMJ Open</i>                                                                                                                                                                                                                                                                                                                                                                                                                                                                                                                                                                                                                                                                                                                                                                                                                                                                                                                                                                                                                                                                                                                                                                                                       |
| Manuscript ID                   | bmjopen-2020-044941.R3                                                                                                                                                                                                                                                                                                                                                                                                                                                                                                                                                                                                                                                                                                                                                                                                                                                                                                                                                                                                                                                                                                                                                                                                |
| Article Type:                   | Protocol                                                                                                                                                                                                                                                                                                                                                                                                                                                                                                                                                                                                                                                                                                                                                                                                                                                                                                                                                                                                                                                                                                                                                                                                              |
| Date Submitted by the Author:   | 05-Jun-2021                                                                                                                                                                                                                                                                                                                                                                                                                                                                                                                                                                                                                                                                                                                                                                                                                                                                                                                                                                                                                                                                                                                                                                                                           |
| Complete List of Authors:       | <p>Li, Edmond; Imperial College London, Patient Safety Translational Research Centre, Institute of Global Health Innovation, Department of Surgery &amp; Cancer; London School of Hygiene and Tropical Medicine Faculty of Infectious and Tropical Diseases, Clinical Research Department</p> <p>Clarke, Jonathan; Imperial College London, Patient Safety Translational Research Centre, Institute of Global Health Innovation, Department of Surgery &amp; Cancer; Imperial College London, Centre for Mathematics of Precision Healthcare</p> <p>Neves, Ana Luisa; Imperial College London, Patient Safety Translational Research Centre, Institute of Global Health Innovation, Department of Surgery &amp; Cancer; University of Porto, Center for Health Technology and Services Research / Department of Community Medicine, Health Information and Decision</p> <p>Ashrafian, Hutan; Imperial College London, Patient Safety Translational Research Centre, Institute of Global Health Innovation, Department of Surgery &amp; Cancer</p> <p>Darzi, Ara; Imperial College London, Patient Safety Translational Research Centre, Institute of Global Health Innovation, Department of Surgery &amp; Cancer</p> |
| <b>Primary Subject Heading</b>: | Health informatics                                                                                                                                                                                                                                                                                                                                                                                                                                                                                                                                                                                                                                                                                                                                                                                                                                                                                                                                                                                                                                                                                                                                                                                                    |
| Secondary Subject Heading:      | Health policy, Public health, Health services research                                                                                                                                                                                                                                                                                                                                                                                                                                                                                                                                                                                                                                                                                                                                                                                                                                                                                                                                                                                                                                                                                                                                                                |
| Keywords:                       | Health informatics < BIOTECHNOLOGY & BIOINFORMATICS, Telemedicine < BIOTECHNOLOGY & BIOINFORMATICS, Information technology < BIOTECHNOLOGY & BIOINFORMATICS, Information management < BIOTECHNOLOGY & BIOINFORMATICS, HEALTH SERVICES ADMINISTRATION & MANAGEMENT, Health policy < HEALTH SERVICES ADMINISTRATION & MANAGEMENT                                                                                                                                                                                                                                                                                                                                                                                                                                                                                                                                                                                                                                                                                                                                                                                                                                                                                        |
|                                 |                                                                                                                                                                                                                                                                                                                                                                                                                                                                                                                                                                                                                                                                                                                                                                                                                                                                                                                                                                                                                                                                                                                                                                                                                       |

SCHOLARONE™  
Manuscripts



I, the Submitting Author has the right to grant and does grant on behalf of all authors of the Work (as defined in the below author licence), an exclusive licence and/or a non-exclusive licence for contributions from authors who are: i) UK Crown employees; ii) where BMJ has agreed a CC-BY licence shall apply, and/or iii) in accordance with the terms applicable for US Federal Government officers or employees acting as part of their official duties; on a worldwide, perpetual, irrevocable, royalty-free basis to BMJ Publishing Group Ltd ("BMJ") its licensees and where the relevant Journal is co-owned by BMJ to the co-owners of the Journal, to publish the Work in this journal and any other BMJ products and to exploit all rights, as set out in our [licence](#).

The Submitting Author accepts and understands that any supply made under these terms is made by BMJ to the Submitting Author unless you are acting as an employee on behalf of your employer or a postgraduate student of an affiliated institution which is paying any applicable article publishing charge ("APC") for Open Access articles. Where the Submitting Author wishes to make the Work available on an Open Access basis (and intends to pay the relevant APC), the terms of reuse of such Open Access shall be governed by a Creative Commons licence – details of these licences and which [Creative Commons](#) licence will apply to this Work are set out in our licence referred to above.

Other than as permitted in any relevant BMJ Author's Self Archiving Policies, I confirm this Work has not been accepted for publication elsewhere, is not being considered for publication elsewhere and does not duplicate material already published. I confirm all authors consent to publication of this Work and authorise the granting of this licence.

# 1 **Electronic Health Records, Interoperability, and Patient Safety in** 2 **Health Systems of High-Income Countries: A Systematic Review** 3 **Protocol**

4 Edmond Li<sup>[1]</sup>, Jonathan Clarke<sup>[1,3]</sup>, Ana Luisa Neves<sup>[1,2]</sup>, Hutan Ashrafian<sup>[1]</sup>, Ara Darzi<sup>[1]</sup>

5 <sup>[1]</sup>Imperial NIHR Patient Safety Translational Research Centre (PSTRC), Institute of Global  
6 Health Innovation (IGHI), Imperial College London, London, United Kingdom

7 <sup>[2]</sup> Department of Community Medicine, Information and Health Decision Sciences (MEDCIDS)  
8 / Center for Health Technology and Services Research (CINTESIS), University of Porto, Porto,  
9 Portugal.

10 <sup>[3]</sup> Centre for Mathematics of Precision Healthcare, Imperial College London, London, United  
11 Kingdom

## 31 **Corresponding author**

32 Name: Edmond Li

33 Email: [edmond.li19@imperial.ac.uk](mailto:edmond.li19@imperial.ac.uk)

34 Address: Institute of Global Health Innovation, Room 1035/7, QEQM Wing, St Mary's Campus,  
35 London W2 1NY

36  
37 **Keywords [MeSH terms]:** electronic health records, electronic medical records, computerised  
38 patient records, health information technology, health information exchanges, interoperability,  
39 patient safety, patient harm, adverse events, health outcomes  
40

## 41 Abstract

### 42 Introduction

43 The availability and routine use of electronic health records (EHRs) have become commonplace  
44 in healthcare systems of many high-income countries. While there is an ever-growing body of  
45 literature pertaining to EHR use, evidence surrounding the importance of EHR interoperability  
46 and its impact on patient safety remains less clear. There is therefore a need and opportunity to  
47 evaluate the evidence available regarding this relationship so as to better inform health  
48 informatics development and policies in the years to come. This systematic review aims to  
49 evaluate the impact of EHR interoperability on patient safety in health systems of high-income  
50 countries.

### 52 Methods and analysis

53 A systematic literature review will be conducted via a computerised search through four  
54 databases: PubMed, Embase, HMIC, and PsycInfo for relevant articles published between 2010  
55 and 2020. Outcomes of interest will include: impact on patient safety, and the broader effects on  
56 health systems. Quality of the randomised quantitative studies will be assessed using Cochrane  
57 Risk of Bias Tool. Non-randomised papers will be evaluated with the Risk of Bias In Non-  
58 Randomised Studies - of Interventions (ROBINS-I) tool. Drummond's Checklist will be utilised  
59 for publications pertaining to economic evaluation. The National Institute for Health and Care  
60 Excellence (NICE) quality appraisal checklist will be used to assess qualitative studies. A  
61 narrative synthesis will be conducted for included studies, and the body of evidence will be  
62 summarised in a summary of findings table.

### 64 Ethics and dissemination

65 This review will summarise published studies with non-identifiable data and thus does not  
66 require ethical approval. Findings will be disseminated through preprints, open access peer-  
67 reviewed publication, and conference presentations.

### 69 PROSPERO registration number [CRD42020209285]

70 This is an open access article distributed in accordance with the Creative Commons Attribution  
71 4.0 Unported (CC BY 4.0) license, which permits others to copy, redistribute, remix, transform  
72 and build upon this work for any purpose, provided the original work is properly cited, a link to  
73 the licence is given, and indication of whether changes were made. See:  
74 <https://creativecommons.org/licenses/by/4.0/>.

## 75 Article Summary

### 76 Strengths and limitations of this study

#### 77 Strengths

- 78 • Inclusion of quantitative, qualitative, and mixed-methods studies can provide a  
79 comprehensive overview of the multitude of ways in which interoperable EHRs may  
80 affect patient safety and health systems.
- 81 • Using robust methodology to examine the wealth of existing literature, the proposed  
82 systematic review attempts to answer a pragmatic question which is integral to future  
83 health informatics development and policies.

1  
2  
3 84  
4 85  
5  
6 86  
7 87  
8 88  
9 89  
10 90  
11 91  
12 92  
13 93  
14  
15  
16  
17  
18  
19  
20  
21  
22  
23  
24  
25  
26  
27  
28  
29  
30  
31  
32  
33  
34  
35  
36  
37  
38  
39  
40  
41  
42  
43  
44  
45  
46  
47  
48  
49  
50  
51  
52  
53  
54  
55  
56  
57  
58  
59  
60

### Limitations

- The heterogeneity of methods and outcomes assessed may obscure the true effect interoperable EHRs have had on patient safety.
- Potential small sample size in subgroup analyses, may negatively impact the statistical power in quantitative data synthesis.
- Limiting the search strategy to English-only publications may not capture studies exploring EHR experiences in non-English speaking countries.

For peer review only

## 94 Introduction

95 Electronic health records (EHRs) have become an integral part of modern healthcare since their  
96 initial mainstream implementation in the mid-late 2000s through the passing of the Health  
97 Information Technology for Economic and Clinical Health Act (HITECH) in the United States  
98 and the NHS National Programme for IT initiative (NPfIT) in England (1–4). From the  
99 documentation & retrieval of patient records and the prescription of medications, to coordinating  
100 complex care plans between different healthcare providers and electronic billing, EHRs fulfil a  
101 multitude of roles for both clinicians and patients alike (5–9).

102  
103 In order to achieve EHR's full potential, it is critical to improve interoperability - i.e., “*the ability*  
104 *of health information systems to work together within and across organisation boundaries in*  
105 *order to advance effective delivery of healthcare for individuals and communities*” (10). The lack  
106 of universal interoperability is often cited as one of the many significant shortcomings of EHRs  
107 currently in use, resulting in duplication in healthcare costs, increased clinician workload fatigue,  
108 and poses a potential risk to patient safety (2). This is especially problematic for patient  
109 populations with chronic conditions, polypharmacy, and multiple comorbidities who are reliant  
110 upon effective patient information sharing via EHRs to facilitate their care (11).

111  
112 Poor EHR interoperability is detrimental to patient safety and costly for health systems. Its  
113 consequences range from increased risks of medication errors, fragmentation of patient data, to  
114 iatrogenic harm resulting from redundant testing, and additional healthcare expenditure (12–17).  
115 In the fragmented EHR landscape of the United Kingdom, measuring the effect poor EHR  
116 interoperability has in the National Health Service (NHS), remain challenging (18). Although  
117 there is a growing body of literature investigating areas such as the facilitators and barriers to  
118 EHR greater adoption, technical capabilities, and usability (19,20), no systematic review has  
119 been conducted exploring specifically the problem of interoperability amongst the assortment of  
120 EHRs in use, how it affects patient safety, and ultimately the financial cost savings lost to health  
121 systems.

122  
123 In a recent systematic review by Dobrow *et al.* assessing the effects of EHR and HIT  
124 interoperability on health systems, 130 publications were included, with the majority being  
125 studies conducted in the United States, utilised quantitative methods, and focussed primarily on  
126 acute healthcare settings. The authors noted the use of interoperable EHRs had a positive impact  
127 on outcomes measures such as quality of care and productivity (19). However, in domains such  
128 as stakeholder engagement, performance & reliability, security & privacy, information quality,  
129 and ease of use, the benefits of interoperable EHRs was less clear (19). Amongst the 130  
130 publications, 17 were reviews with the majority directed at exploring facilitators & barriers to  
131 EHR implementation, and the general benefits and impact of EHR use. While this review did  
132 focus on studies pertaining to the topic of interoperable EHRs, this was done so only from a  
133 broad perspective and included studies exploring a wide range of outcomes related to the effects  
134 of EHR on healthcare rather than specifically on their implications to patient safety.

135  
136 In another review by Hersh *et al.*, the authors explored how health information exchange (HIE)  
137 affected health systems on a variety of domains, including costs, healthcare utilisation, health

138 outcomes, healthcare worker attitudes, and sustainability. Despite the widespread routinely use  
 139 of HIE, the authors described a general lack of robust evidence on the quality, costs, efficiency,  
 140 usage, and sustainability (21). However, there was some evidence demonstrating HIEs being  
 141 associated with reduced utilisation and costs in emergency care settings despite methodological  
 142 issues being present in many of the included publications (21). Although this review was  
 143 ambitious in the wide scope of interest regarding the effects of HIE use, patient safety was not a  
 144 primary topic of focus. Another limitation of this study was that it only contained US-based  
 145 publications, and thus findings lack generalisability internationally to other health systems in  
 146 high-income countries (HIC) which are both organised, financed differently.

## 147 Research aim

148 The overall aim of this literature review is to explore how EHR interoperability impacts patient  
 149 safety, in the context of health systems in HICs. The results generated will aim to inform  
 150 healthcare policymakers and help shape more effective EHR system implementation and  
 151 modernisation efforts in the coming years.

## 152 Methods and analysis

### 153 Search strategy

154 A computerised search of the literature published in the last 10 years (2010 to 2020) search will  
 155 be performed on PubMed/Medline, Embase, Cumulative Index to Nursing and Allied Health  
 156 Literature (CINAHL), Health Management Information Consortium (HMIC), and PsycInfo. This  
 157 publication timeframe was chosen as it coincides with the mainstream implementation of EHRs  
 158 in several HIC healthcare systems such as Kaiser Permanente in the US, and thus would select  
 159 for the most up to date, relevant evidence concerning EHR interoperability and patient safety  
 160 challenges faced by healthcare systems today to be included (22,23). The list of search strings  
 161 used will include both free text and controlled terms, whenever supported (Table 1) and will be  
 162 iteratively refined in consultation with the Imperial College St. Mary's campus medical librarian.  
 163 For a sample of the search strategy, please see Supplement 1.

164 Grey literature sources will also be searched, including registrations in the International  
 165 Prospective Register of Systematic Reviews, reports of relevant stakeholder organisations (NHS  
 166 England, American Medical Informatics Association (AMIA), eHealth at WHO, and conference  
 167 proceedings (last 5 years) of several related conferences (AMIA, MedInfo, Medicine 2.0,  
 168 Medicine X)), in order to identify possible additional studies that meet the inclusion criteria.

169 The search has also been restricted to HIC and articles published in English only.

170 *Table 1: Concepts and database search terms*

| Electronic health records                                                                                           |            | Interoperability                                                                                                                                   |            | Patient safety                                                                                                                      |
|---------------------------------------------------------------------------------------------------------------------|------------|----------------------------------------------------------------------------------------------------------------------------------------------------|------------|-------------------------------------------------------------------------------------------------------------------------------------|
| <ul style="list-style-type: none"> <li>● Electronic health records</li> <li>● Electronic medical records</li> </ul> | <b>AND</b> | <ul style="list-style-type: none"> <li>● Interoperability</li> <li>● Health information interoperability</li> <li>● Systems integration</li> </ul> | <b>AND</b> | <ul style="list-style-type: none"> <li>● Patient safety</li> <li>● Patient adj1 incident*</li> <li>● Adverse adj1 event*</li> </ul> |



|                                                                                                                                                                                                                                                                                                |  |  |  |                                                                                                                                   |
|------------------------------------------------------------------------------------------------------------------------------------------------------------------------------------------------------------------------------------------------------------------------------------------------|--|--|--|-----------------------------------------------------------------------------------------------------------------------------------|
| <ul style="list-style-type: none"> <li>● Computerised medical records systems</li> <li>● Health information exchange / HIE</li> <li>● Health information technology / HIT</li> <li>● Hospital information systems</li> <li>● Medical informatics</li> <li>● Medical records linkage</li> </ul> |  |  |  | <ul style="list-style-type: none"> <li>● Patient adj1 outcome*</li> <li>● Patient adj1 harm</li> <li>● Risk management</li> </ul> |
|------------------------------------------------------------------------------------------------------------------------------------------------------------------------------------------------------------------------------------------------------------------------------------------------|--|--|--|-----------------------------------------------------------------------------------------------------------------------------------|

171

## 172 Study selection criteria

173 A summary of the population, intervention, comparison, outcomes, and type of studies being  
 174 considered is provided in **Table 2**. This systematic review will focus on studies performed in  
 175 high-income countries and published in English only. High-income countries will be defined in  
 176 accordance with the World Bank's definition of "countries where the gross national income  
 177 (GNI) per capita is higher than \$12,536 USD" (24). Studies assessing the impact of EHR  
 178 interoperability will be included. Interventions will include EHR systems interoperable with  
 179 other health information technology systems both within and across healthcare facilities, as well  
 180 as those used in tertiary and community settings. The primary outcomes to be considered in this  
 181 review will be safety outcomes, including adverse events/incidents, safety-related patient  
 182 experiences, and health outcomes. In addition, secondary outcomes would include studies  
 183 exploring the broader impact of interoperable EHRs on health systems such as cost effectiveness  
 184 and clinical culture amongst healthcare providers on the topic Quantitative, qualitative, and  
 185 mixed methods studies will be included. Reference lists of the selected articles will also be  
 186 screened for papers which may have been missed by the initial database search but still meet the  
 187 eligibility criteria.

188

189 *Table 2: PICO inclusion criteria*

|                     |                                                           |
|---------------------|-----------------------------------------------------------|
| <i>Population</i>   | High-income countries utilising electronic health records |
| <i>Intervention</i> | EHRs with interoperability                                |
| <i>Comparison</i>   | Usual care (i.e., existing baseline of interoperability)  |
| <i>Outcome</i>      | Impact on patient safety and quality of care              |

## 190 Screening

191 Articles to be included will be screened by two independent reviewers, following the process  
 192 described in the Preferred Reporting Items for Systematic Reviews and Meta-Analyses  
 193 (PRISMA) flow diagram (25). The initial screening will be done by the first reviewer based on

194 the publication titles, followed by a second screening based on the abstracts. Included abstracts  
195 will then be fully reviewed by two independent researchers to produce a unified selection of  
196 articles to be included in this review. Cohen's kappa will be calculated to ensure inter-rater  
197 agreement and consistency in the selection of studies to be included (26,27). Any disagreements  
198 will be resolved by consensus; if a Cohen's kappa value of less than 0.6 is reported, the  
199 discrepancies will be addressed through discussions with a more experienced third investigator.

#### 200 Data extraction

201 Data extraction will be performed using a standardised extraction table for each of the two  
202 investigators to summarise the characteristics and findings of each included study, including  
203 name of the first author, year of publication, study design, number of participants, retention rates,  
204 setting characteristics, outcome measures, and main results. The content of the two summary  
205 tables will then be aggregated and reviewed once more by both investigators, with any  
206 disagreements being solved by the third senior investigator.

#### 208 Quality assessment

209 The quality of randomised controlled trials and cluster randomised trials will be assessed using  
210 the Cochrane Risk of Bias Tool (28), and the quality of non-randomised intervention studies (i.e.,  
211 case control, cohort, quasi-experimental) will be appraised using the 'Risk of Bias In Non-  
212 Randomised Studies - of Interventions' (ROBINS-I) tool (29). For cost-effectiveness studies, the  
213 Drummond's checklist for assessing economic evaluations will be used (30). The National  
214 Institute for Health and Care Excellence (NICE) quality appraisal checklist will be utilised to  
215 assess the selected qualitative studies (31). Two independent reviewers will score the selected  
216 studies and any disagreements will be resolved by a third person. A risk of bias table along with  
217 an overall, collective bias narrative will be produced to summarise the biases of outcomes  
218 observed amongst the evaluated studies.

#### 220 Narrative synthesis, subgroup analysis, and meta-analysis

221 A narrative synthesis will be performed for all studies included in this systematic review to  
222 summarise any salient findings observed (32).

224 In quantitative studies with homogenous or comparable outcome measures, whenever possible,  
225 continuous and dichotomous outcomes will be pooled together in a meta-analysis. If possible,  
226 effect sizes will be transformed in a common metric (Hedges'  $g$  – the bias-corrected standardised  
227 difference in means) and classified as positive when in favour of the intervention. Heterogeneity  
228 will be assessed using  $I^2$  and the presence of publication bias will be evaluated using a funnel  
229 plot and the Duval and Tweedie's trim and fill method (33).

231 For both qualitative and quantitative studies that report comparable outcomes, a subgroup  
232 analysis based on clinical settings (e.g., primary vs. secondary healthcare settings) will be  
233 conducted to explore any patterns or relationships ascertained from the data. Through a  
234 standardised spreadsheet shared amongst the reviewers, the body of evidence will be organised  
235 in two separate Summary of Findings tables (for both qualitative and quantitative studies) in  
236 accordance to the 'Grading of Recommendations Assessment, Development and Evaluation'  
237 (GRADE) criteria (34).

## 239 Patient and public involvement

240 This systematic literature review saw no direct participation by patients or the public during the  
241 design of this study. However, this study was designed following a series of structured  
242 interviews with patients regarding their experience of attending multiple institutions for hospital  
243 care (35). As this literature review will be used to form the basis for subsequent studies exploring  
244 the topic including ones involving patients, findings from this review will be shared with patient  
245 research groups to gain feedback and encourage further discourse surrounding the topic of EHR  
246 interoperability and patient safety.  
247

## 248 Amendments

249 Any amendments to this protocol will be documented with reference to saved searches and  
250 analysis methods, which will be recorded in bibliographic databases, Mendeley and Excel  
251 templates for data collection and synthesis.

## 252 Discussion

253 One of the primary strengths stemming from the almost exploratory nature of this systematic  
254 review is the ability to generate a succinct, comprehensive appraisal of the best evidence  
255 currently available regarding how EHR interoperability impacts patient care and safety. By  
256 publishing this review protocol beforehand, we demonstrate a clear, robust, and transparent  
257 approach to aggregating the anticipated assortment of literature on the subject in question.  
258

259 There are also some limitations to be acknowledged. By restricting the inclusion criteria to  
260 publications made in English only, this could potentially exclude relevant papers pertaining to  
261 interoperable EHR systems in non-English healthcare settings. However, this is expected to be  
262 minimal as the majority of the papers concerning this topic published from the United States and  
263 European countries and are primarily done so in English journals. It must also be noted that both  
264 the heterogeneity of measures and outcomes evaluated, as well as the potentially reduced number  
265 of studies in subgroup analyses, may negatively influence the statistical power in data synthesis,  
266 and may preclude pooling of data as a meta-analysis. With such diverse means of measuring and  
267 assessing the effects of EHR interoperability, this will likely make comparisons between studies  
268 difficult and may obscure the true measure of effect EHR interoperability has had in the clinical  
269 setting. To mitigate this risk, outcomes will be grouped whenever possible, and summarised as a  
270 narrative synthesis. However, this can also represent a strength, as it will provide a  
271 comprehensive overview on the subject, capitalising on various research methodologies and  
272 providing novel insights on the impact of interoperable EHR systems on patient safety.  
273

## 274 Ethics and Dissemination

275 This review will summarise published studies with non-identifiable data and therefore does not  
276 require ethical approval. This protocol complies with the Preferred Reporting Items for  
277 Systematic Review and Meta-Analyses Protocols guidelines. Findings will be disseminated  
278 through preprints, open access peer-reviewed publication, and conference presentations.

## 279 Acknowledgments

280 We would like to thank Michael Gainsford (Library Manager and Liaison Librarian at Imperial  
281 College London) for his support and guidance provided to improve the composition of the search  
282 terms and procedural aspects of the overall search strategy.

For peer review only

## References

1. Colicchio TK, Cimino JJ, Del Fiol G. Unintended consequences of nationwide electronic health record adoption: Challenges and opportunities in the post-meaningful use era. *Journal of Medical Internet Research*. [Online] 2019;21(6): 1–9. Available from: doi:10.2196/13313
2. Roman LC, Ancker JS, Johnson SB, Senathirajah Y. Navigation in the electronic health record: A review of the safety and usability literature. *Journal of Biomedical Informatics*. [Online] Elsevier Inc.; 2017;67: 69–79. Available from: doi:10.1016/j.jbi.2017.01.005
3. Justinia T. The UK’s National Programme for IT: Why was it dismantled? *Health Services Management Research*. [Online] 2017;30(1): 2–9. Available from: doi:10.1177/0951484816662492
4. Wachter RM. Making IT work : harnessing the power of health IT to improve care in England. *National Advisory Group on Health Information Technology in England*. [Online] 2016; 71. Available from: [https://www.gov.uk/government/uploads/system/uploads/attachment\\_data/file/550866/Wachter\\_Review\\_Accessible.pdf](https://www.gov.uk/government/uploads/system/uploads/attachment_data/file/550866/Wachter_Review_Accessible.pdf)  
[https://assets.publishing.service.gov.uk/government/uploads/system/uploads/attachment\\_data/file/550866/Wachter\\_Review\\_Accessible.pdf](https://assets.publishing.service.gov.uk/government/uploads/system/uploads/attachment_data/file/550866/Wachter_Review_Accessible.pdf)
5. Kruse CS, Kristof C, Jones B, Mitchell E, Martinez A. Barriers to Electronic Health Record Adoption: a Systematic Literature Review. *Journal of Medical Systems*. [Online] *Journal of Medical Systems*; 2016;40(12). Available from: doi:10.1007/s10916-016-0628-9
6. Ayaad O, Alloubani A, ALhajaa EA, Farhan M, Abuseif S, Al Hroub A, et al. The role of electronic medical records in improving the quality of health care services: Comparative study. *International Journal of Medical Informatics*. [Online] Elsevier; 2019;127(April): 63–67. Available from: doi:10.1016/j.ijmedinf.2019.04.014
7. Evans RS. Electronic Health Records: Then, Now, and in the Future. *Yearbook of Medical Informatics*. [Online] 2016;25(S 01): S48–S61. Available from: doi:10.15265/IYS-2016-s006
8. Gagnon MP, Payne-Gagnon J, Breton E, Fortin JP, Khoury L, Dolovich L, et al. Adoption of electronic personal health records in Canada: Perceptions of stakeholders. *International Journal of Health Policy and Management*. [Online] 2016;5(7): 425–433. Available from: doi:10.15171/ijhpm.2016.36
9. Campanella P, Lovato E, Marone C, Fallacara L, Mancuso A, Ricciardi W, et al. The impact of electronic health records on healthcare quality: a systematic review and meta-analysis. *The European Journal of Public Health*. [Online] 2016;26(1): 60–64. Available from: doi:10.1093/eurpub/ckv122
10. Reis ZSN, Maia TA, Marcolino MS, Becerra-Posada F, Novillo-Ortiz D, Ribeiro ALP. Is There Evidence of Cost Benefits of Electronic Medical Records, Standards, or Interoperability in Hospital Information Systems? Overview of Systematic Reviews. *JMIR Medical Informatics*. [Online] 2017;5(3): e26. Available from: doi:10.2196/medinform.7400
11. World Health Organization (WHO). *eHealth in the Region of the Americas: breaking down the barriers to implementation*. [Online] 2016. Available from: <http://iris.paho.org/xmlui/bitstream/handle/123456789/31286/9789275119259-eng.pdf?sequence=6&isAllowed=y>
12. Zaheer S, Pimentel SD, Simmons KD, Kuo LE, Datta J, Williams N, et al. Comparing



- 329 International and United States Undergraduate Medical Education and Surgical Outcomes  
 330 Using a Refined Balance Matching Methodology. *Annals of Surgery*. [Online] 2017;  
 331 Available from: doi:10.1097/SLA.0000000000001878
- 332 13. Everson J, Adler-Milstein J. Gaps in health information exchange between hospitals that  
 333 treat many shared patients. *Journal of the American Medical Informatics Association*.  
 334 [Online] 2018;25(9): 1114–1121. Available from: doi:10.1093/jamia/ocy089
- 335 14. Thompson MP, Graetz I. Hospital adoption of interoperability functions. *Healthcare*.  
 336 [Online] Elsevier Inc.; 2019;7(3): 100347. Available from:  
 337 doi:10.1016/j.hjdsi.2018.12.001
- 338 15. Tapuria A, Kalra D, Kobayashi S. Contribution of clinical archetypes, and the challenges,  
 339 towards achieving semantic interoperability for EHRs. *Healthcare Informatics Research*.  
 340 [Online] 2013;19(4): 286–292. Available from: doi:10.4258/hir.2013.19.4.286
- 341 16. Warren LR, Clarke JM, Arora S, Darzi AW. Improving data sharing between acute  
 342 hospitals in England: an overview of health record system distribution and retrospective  
 343 observational analysis of inter-hospital transitions of care. *BMJ Open*. [Online]  
 344 2019;9(12): e031637. Available from: doi:10.1136/bmjopen-2019-031637
- 345 17. Clarke JM, Warren LR, Arora S, Barahona M, Darzi AW. Guiding interoperable  
 346 electronic health records through patient-sharing networks. *npj Digital Medicine*. [Online]  
 347 Springer US; 2018;1(1): 1–6. Available from: doi:10.1038/s41746-018-0072-y
- 348 18. McAlearney AS, Sieck C, Hefner J, Robbins J, Huerta TR. Facilitating Ambulatory  
 349 Electronic Health Record System Implementation: Evidence from a Qualitative Study.  
 350 *BioMed Research International*. [Online] 2013;2013: 1–9. Available from:  
 351 doi:10.1155/2013/629574
- 352 19. Dobrow MJ, Bytautas JP, Tharmalingam S, Hagens S. Interoperable Electronic Health  
 353 Records and Health Information Exchanges: Systematic Review. *JMIR Medical  
 354 Informatics*. [Online] 2019;7(2): e12607. Available from: doi:10.2196/12607
- 355 20. Zahabi M, Kaber DB, Swangnetr M. Usability and Safety in Electronic Medical Records  
 356 Interface Design: A Review of Recent Literature and Guideline Formulation. *Human  
 357 Factors*. [Online] 2015;57(5): 805–834. Available from: doi:10.1177/0018720815576827
- 358 21. Hersh WR, Totten AM, Eden KB, Devine B, Gorman P, Kassakian SZ, et al. Outcomes  
 359 From Health Information Exchange: Systematic Review and Future Research Needs.  
 360 *JMIR Medical Informatics*. [Online] 2015;3(4): e39. Available from:  
 361 doi:10.2196/medinform.5215
- 362 22. Wheatley B. Transforming care delivery through health information technology. *The  
 363 Permanente journal*. [Online] Winter; 2013;17(1): 81–86. Available from:  
 364 doi:10.7812/TPP/12-030 [Accessed: 20th January 2021]
- 365 23. Chen C, Permanente K. The Kaiser Permanente Electronic Health Record: Transforming  
 366 And Streamlining Modalities Of Care. 2009; Available from: doi:10.1377/hlthaff.28.2.323  
 367 [Accessed: 22nd January 2021]
- 368 24. World Bank. *World Bank Country and Lending Groups – World Bank Data Help Desk*.  
 369 [Online] The World Bank. p. 1–8. Available from:  
 370 <https://datahelpdesk.worldbank.org/knowledgebase/articles/906519> [Accessed: 26th May  
 371 2021]
- 372 25. Moher D, Liberati A, Tetzlaff J, Altman DG, Altman D, Antes G, et al. Preferred  
 373 reporting items for systematic reviews and meta-analyses: The PRISMA statement. *PLoS  
 374 Medicine*. [Online] 2009;6(7). Available from: doi:10.1371/journal.pmed.1000097

- 1  
2  
3 375 26. Landis JR, Koch GG. The Measurement of Observer Agreement for Categorical Data.  
4 376 *Biometrics*. [Online] 1977;33(1): 159. Available from: doi:10.2307/2529310  
5 377 27. McHugh ML. Interrater reliability: the kappa statistic. *Biochemia medica*. 2012;22(3):  
6 378 276–282.  
7  
8 379 28. Sterne JAC, Savović J, Page MJ, Elbers RG, Blencowe NS, Boutron I, et al. RoB 2: A  
9 380 revised tool for assessing risk of bias in randomised trials. *The BMJ*. [Online]  
10 381 2019;366(August). Available from: doi:10.1136/bmj.l4898  
11 382 29. Sterne JA, Hernán MA, Reeves BC, Savović J, Berkman ND, Viswanathan M, et al.  
12 383 ROBINS-I: A tool for assessing risk of bias in non-randomised studies of interventions.  
13 384 *BMJ (Online)*. [Online] 2016;355: 4–10. Available from: doi:10.1136/bmj.i4919  
14 385 30. Drummond MF, Brien BJ, Torrance GW, Stoddart GL. *Methods for the Economic*  
15 386 *Evaluation of Health Care Programmes*.. 2nd ed. Oxford University Press; 1997.  
16 387 31. *Methods for the development of NICE public health guidance*. [Online]. 3rd n. National  
17 388 Institute for Clinical Excellence (NICE); 2018. Available from:  
18 389 [https://www.nice.org.uk/process/pmg4/resources/methods-for-the-development-of-nice-](https://www.nice.org.uk/process/pmg4/resources/methods-for-the-development-of-nice-public-health-guidance-third-edition-pdf-2007967445701)  
19 390 [public-health-guidance-third-edition-pdf-2007967445701](https://www.nice.org.uk/process/pmg4/resources/methods-for-the-development-of-nice-public-health-guidance-third-edition-pdf-2007967445701)  
20 391 32. Popay, J., Roberts, H., Sowden, A., Petticrew, M., Arai, L., Rodgers, M., ... & Duffy S.  
21 392 Guidance on the conduct of narrative synthesis in systematic reviews. A product from the  
22 393 ESRC methods programme. 2006;(April 2006): 1–92.  
23 394 33. Duval S, Tweedie R. Trim and fill: A simple funnel-plot-based method of testing and  
24 395 adjusting for publication bias in meta-analysis. *Biometrics*. [Online] Biometric Society;  
25 396 2000;56(2): 455–463. Available from: doi:10.1111/j.0006-341X.2000.00455.x [Accessed:  
26 397 20th January 2021]  
27 398 34. Guyatt GH, Oxman AD, Vist GE, Kunz R, Falck-Ytter Y, Alonso-Coello P, et al.  
28 399 GRADE: an emerging consensus on rating quality of evidence and strength of  
29 400 recommendations. *BMJ*. [Online] 2008;336(7650): 924–926. Available from:  
30 401 doi:10.1136/bmj.39489.470347.AD  
31 402 35. Warren LR, Harrison M, Arora S, Darzi A. Working with patients and the public to design  
32 403 an electronic health record interface: A qualitative mixed-methods study. *BMC Medical*  
33 404 *Informatics and Decision Making*. [Online] BMC Medical Informatics and Decision  
34 405 Making; 2019;19(1): 1–8. Available from: doi:10.1186/s12911-019-0993-7  
35 406  
36  
37  
38  
39  
40  
41  
42  
43  
44  
45  
46  
47  
48  
49  
50  
51  
52  
53  
54  
55  
56  
57  
58  
59  
60



## 407 Authors' contributions

408 Conception and design of the work: EL, ALN, and JC wrote the manuscript. HA, and AD  
409 provided critical revision of drafts for important intellectual content. All authors provided input  
410 into drafts of the manuscript and agree on the contents of the final version.

## 411 Funding statement

412 This research was supported through the Imperial College National Institute for Health Research  
413 (NIHR) Patient Safety Translational Research Centre (PSTRC) and the Imperial College  
414 Biomedical Research Centre (BRC). JC acknowledges support from the Wellcome Trust  
415 [215938/Z/19/Z]. However, the funder/sponsor has had no role in development and drafting of  
416 this protocol.

## 417 Competing Interests

418 The authors declare that there are no competing interests.

419

420 **Word count:** 3886

421

**Supplement 1:** Search strategy exploring main themes, utilizing search terms and related terminology derivations for each theme (electronic health records, interoperability, and patient safety).

| #  | Searches                                                                                                                                                                                                                                                                                                         |
|----|------------------------------------------------------------------------------------------------------------------------------------------------------------------------------------------------------------------------------------------------------------------------------------------------------------------|
| 1  | exp Medical Records Systems, Computerized/ or exp Electronic Health Records/ or exp Hospital Information Systems/                                                                                                                                                                                                |
| 2  | limit 1 to (english language and yr="2010 - 2020")                                                                                                                                                                                                                                                               |
| 3  | exp Electronic Health Records/                                                                                                                                                                                                                                                                                   |
| 4  | limit 3 to (english language and yr="2010 - 2020")                                                                                                                                                                                                                                                               |
| 5  | exp Health Information Exchange/ or exp Medical Informatics/ or exp Decision Support Systems, Clinical/ or exp Medical Records Systems, Computerized/ or exp Medical Record Linkage/                                                                                                                             |
| 6  | limit 5 to (english language and yr="2010 - 2020")                                                                                                                                                                                                                                                               |
| 7  | exp Medical Informatics/                                                                                                                                                                                                                                                                                         |
| 8  | limit 7 to (english language and yr="2010 - 2020")                                                                                                                                                                                                                                                               |
| 9  | exp Hospital Information Systems/                                                                                                                                                                                                                                                                                |
| 10 | limit 9 to (english language and yr="2010 - 2020")                                                                                                                                                                                                                                                               |
| 11 | exp Medical Informatics/                                                                                                                                                                                                                                                                                         |
| 12 | limit 11 to (english language and yr="2010 - 2020")                                                                                                                                                                                                                                                              |
| 13 | exp Health Information Interoperability/                                                                                                                                                                                                                                                                         |
| 14 | limit 13 to (english language and yr="2010 - 2020")                                                                                                                                                                                                                                                              |
| 15 | exp Systems Integration/                                                                                                                                                                                                                                                                                         |
| 16 | limit 15 to (english language and yr="2010 - 2020")                                                                                                                                                                                                                                                              |
| 17 | exp Patient Safety/                                                                                                                                                                                                                                                                                              |
| 18 | limit 17 to (english language and yr="2010 - 2020")                                                                                                                                                                                                                                                              |
| 19 | (Patient adj1 incident*).mp. [mp=title, abstract, original title, name of substance word, subject heading word, floating sub-heading word, keyword heading word, organism supplementary concept word, protocol supplementary concept word, rare disease supplementary concept word, unique identifier, synonyms] |
| 20 | limit 19 to (english language and yr="2010 - 2020")                                                                                                                                                                                                                                                              |
| 21 | (Adverse adj1 event*).mp. [mp=title, abstract, original title, name of substance word, subject heading word, floating sub-heading word, keyword heading word, organism supplementary                                                                                                                             |

|    |                                                                                                                                                                                                                                                                                                                 |
|----|-----------------------------------------------------------------------------------------------------------------------------------------------------------------------------------------------------------------------------------------------------------------------------------------------------------------|
|    | concept word, protocol supplementary concept word, rare disease supplementary concept word, unique identifier, synonyms]                                                                                                                                                                                        |
| 22 | limit 21 to (english language and yr="2010 - 2020")                                                                                                                                                                                                                                                             |
| 23 | (Patient adj1 outcome*).mp. [mp=title, abstract, original title, name of substance word, subject heading word, floating sub-heading word, keyword heading word, organism supplementary concept word, protocol supplementary concept word, rare disease supplementary concept word, unique identifier, synonyms] |
| 24 | limit 23 to (english language and yr="2010 - 2020")                                                                                                                                                                                                                                                             |
| 25 | (Patient adj1 harm).mp. [mp=title, abstract, original title, name of substance word, subject heading word, floating sub-heading word, keyword heading word, organism supplementary concept word, protocol supplementary concept word, rare disease supplementary concept word, unique identifier, synonyms]     |
| 26 | limit 25 to (english language and yr="2010 - 2020")                                                                                                                                                                                                                                                             |
| 27 | exp Risk Management/                                                                                                                                                                                                                                                                                            |
| 28 | limit 27 to (english language and yr="2010 - 2020")                                                                                                                                                                                                                                                             |
| 29 | 2 or 4 or 6 or 8 or 10 or 12                                                                                                                                                                                                                                                                                    |
| 30 | 14 or 16                                                                                                                                                                                                                                                                                                        |
| 31 | 18 or 20 or 22 or 24 or 26 or 28                                                                                                                                                                                                                                                                                |
| 32 | 29 and 30 and 31                                                                                                                                                                                                                                                                                                |

**PRISMA-P (Preferred Reporting Items for Systematic review and Meta-Analysis Protocols) 2015 checklist: recommended items to address in a systematic review protocol\***

| Section and topic                 | Item No. | Checklist item                                                                                                                                                                                                                | Reported on Page No. |
|-----------------------------------|----------|-------------------------------------------------------------------------------------------------------------------------------------------------------------------------------------------------------------------------------|----------------------|
| <b>ADMINISTRATIVE INFORMATION</b> |          |                                                                                                                                                                                                                               |                      |
| Title:                            |          |                                                                                                                                                                                                                               |                      |
| Identification                    | 1a       | Identify the report as a protocol of a systematic review                                                                                                                                                                      | 1                    |
| Update                            | 1b       | If the protocol is for an update of a previous systematic review, identify as such                                                                                                                                            | N/A                  |
| Registration                      | 2        | If registered, provide the name of the registry (such as PROSPERO) and registration number                                                                                                                                    | 3                    |
| Authors:                          |          |                                                                                                                                                                                                                               |                      |
| Contact                           | 3a       | Provide name, institutional affiliation, e-mail address of all protocol authors; provide physical mailing address of corresponding author                                                                                     | 1                    |
| Contributions                     | 3b       | Describe contributions of protocol authors and identify the guarantor of the review                                                                                                                                           | 1                    |
| Amendments                        | 4        | If the protocol represents an amendment of a previously completed or published protocol, identify as such and list changes; otherwise, state plan for documenting important protocol amendments                               | N/A                  |
| Support:                          |          |                                                                                                                                                                                                                               |                      |
| Sources                           | 5a       | Indicate sources of financial or other support for the review                                                                                                                                                                 | 8                    |
| Sponsor                           | 5b       | Provide name for the review funder and/or sponsor                                                                                                                                                                             | 8                    |
| Role of sponsor or funder         | 5c       | Describe roles of funder(s), sponsor(s), and/or institution(s), if any, in developing the protocol                                                                                                                            | 8                    |
| <b>INTRODUCTION</b>               |          |                                                                                                                                                                                                                               |                      |
| Rationale                         | 6        | Describe the rationale for the review in the context of what is already known                                                                                                                                                 | 4-5                  |
| Objectives                        | 7        | Provide an explicit statement of the question(s) the review will address with reference to participants, interventions, comparators, and outcomes (PICO)                                                                      | 5                    |
| <b>METHODS</b>                    |          |                                                                                                                                                                                                                               |                      |
| Eligibility criteria              | 8        | Specify the study characteristics (such as PICO, study design, setting, time frame) and report characteristics (such as years considered, language, publication status) to be used as criteria for eligibility for the review | 5-6                  |
| Information sources               | 9        | Describe all intended information sources (such as electronic databases, contact with study authors, trial registers or other grey literature sources) with planned dates of coverage                                         | 5                    |
| Search strategy                   | 10       | Present draft of search strategy to be used for at least one electronic database, including planned limits, such that it could be repeated                                                                                    | 5                    |

|                                    |     |                                                                                                                                                                                                                                                  |     |
|------------------------------------|-----|--------------------------------------------------------------------------------------------------------------------------------------------------------------------------------------------------------------------------------------------------|-----|
| Study records:                     |     |                                                                                                                                                                                                                                                  |     |
| Data management                    | 11a | Describe the mechanism(s) that will be used to manage records and data throughout the review                                                                                                                                                     | 6-7 |
| Selection process                  | 11b | State the process that will be used for selecting studies (such as two independent reviewers) through each phase of the review (that is, screening, eligibility and inclusion in meta-analysis)                                                  | 6   |
| Data collection process            | 11c | Describe planned method of extracting data from reports (such as piloting forms, done independently, in duplicate), any processes for obtaining and confirming data from investigators                                                           | 6-7 |
| Data items                         | 12  | List and define all variables for which data will be sought (such as PICO items, funding sources), any pre-planned data assumptions and simplifications                                                                                          | 6   |
| Outcomes and prioritization        | 13  | List and define all outcomes for which data will be sought, including prioritization of main and additional outcomes, with rationale                                                                                                             | 6   |
| Risk of bias in individual studies | 14  | Describe anticipated methods for assessing risk of bias of individual studies, including whether this will be done at the outcome or study level, or both; state how this information will be used in data synthesis                             | 6-7 |
| Data synthesis                     | 15a | Describe criteria under which study data will be quantitatively synthesised                                                                                                                                                                      | 6-7 |
|                                    | 15b | If data are appropriate for quantitative synthesis, describe planned summary measures, methods of handling data and methods of combining data from studies, including any planned exploration of consistency (such as $I^2$ , Kendall's $\tau$ ) | 7   |
|                                    | 15c | Describe any proposed additional analyses (such as sensitivity or subgroup analyses, meta-regression)                                                                                                                                            | -   |
|                                    | 15d | If quantitative synthesis is not appropriate, describe the type of summary planned                                                                                                                                                               | 7   |
| Meta-bias(es)                      | 16  | Specify any planned assessment of meta-bias(es) (such as publication bias across studies, selective reporting within studies)                                                                                                                    | 6-7 |
| Confidence in cumulative evidence  | 17  | Describe how the strength of the body of evidence will be assessed (such as GRADE)                                                                                                                                                               | 7   |

**\* It is strongly recommended that this checklist be read in conjunction with the PRISMA-P Explanation and Elaboration (cite when available) for important clarification on the items. Amendments to a review protocol should be tracked and dated. The copyright for PRISMA-P (including checklist) is held by the PRISMA-P Group and is distributed under a Creative Commons Attribution Licence 4.0.**

*From: Shamseer L, Moher D, Clarke M, Ghersi D, Liberati A, Petticrew M, Shekelle P, Stewart L, PRISMA-P Group. Preferred reporting items for systematic review and meta-analysis protocols (PRISMA-P) 2015: elaboration and explanation. BMJ. 2015 Jan 2;349(jan02 1):g7647.*
