# Supplementary material for: Electronic Health Records, Interoperability and Patient Safety in Health Systems of High-income Countries: A Systematic Review Protocol
Source: PubMed Central journal article supplement (PMC8280868; doi:10.1136/bmjopen-2020-044941), 2021-07-14
Supplement: bmjopen-2020-044941supp001.pdf [file bmjopen-2020-044941supp001.pdf]

**Supplement 1:** Search strategy exploring main themes, utilizing search terms and related terminology derivations for each theme (electronic health records, interoperability, and patient safety).

| #  | Searches                                                                                                                                                                                                                                                                                                         |
|----|------------------------------------------------------------------------------------------------------------------------------------------------------------------------------------------------------------------------------------------------------------------------------------------------------------------|
| 1  | exp Medical Records Systems, Computerized/ or exp Electronic Health Records/ or exp Hospital Information Systems/                                                                                                                                                                                                |
| 2  | limit 1 to (english language and yr="2010 - 2020")                                                                                                                                                                                                                                                               |
| 3  | exp Electronic Health Records/                                                                                                                                                                                                                                                                                   |
| 4  | limit 3 to (english language and yr="2010 - 2020")                                                                                                                                                                                                                                                               |
| 5  | exp Health Information Exchange/ or exp Medical Informatics/ or exp Decision Support Systems, Clinical/ or exp Medical Records Systems, Computerized/ or exp Medical Record Linkage/                                                                                                                             |
| 6  | limit 5 to (english language and yr="2010 - 2020")                                                                                                                                                                                                                                                               |
| 7  | exp Medical Informatics/                                                                                                                                                                                                                                                                                         |
| 8  | limit 7 to (english language and yr="2010 - 2020")                                                                                                                                                                                                                                                               |
| 9  | exp Hospital Information Systems/                                                                                                                                                                                                                                                                                |
| 10 | limit 9 to (english language and yr="2010 - 2020")                                                                                                                                                                                                                                                               |
| 11 | exp Medical Informatics/                                                                                                                                                                                                                                                                                         |
| 12 | limit 11 to (english language and yr="2010 - 2020")                                                                                                                                                                                                                                                              |
| 13 | exp Health Information Interoperability/                                                                                                                                                                                                                                                                         |
| 14 | limit 13 to (english language and yr="2010 - 2020")                                                                                                                                                                                                                                                              |
| 15 | exp Systems Integration/                                                                                                                                                                                                                                                                                         |
| 16 | limit 15 to (english language and yr="2010 - 2020")                                                                                                                                                                                                                                                              |
| 17 | exp Patient Safety/                                                                                                                                                                                                                                                                                              |
| 18 | limit 17 to (english language and yr="2010 - 2020")                                                                                                                                                                                                                                                              |
| 19 | (Patient adj1 incident*).mp. [mp=title, abstract, original title, name of substance word, subject heading word, floating sub-heading word, keyword heading word, organism supplementary concept word, protocol supplementary concept word, rare disease supplementary concept word, unique identifier, synonyms] |
| 20 | limit 19 to (english language and yr="2010 - 2020")                                                                                                                                                                                                                                                              |
| 21 | (Adverse adj1 event*).mp. [mp=title, abstract, original title, name of substance word, subject heading word, floating sub-heading word, keyword heading word, organism supplementary                                                                                                                             |

|    |                                                                                                                                                                                                                                                                                                                 |
|----|-----------------------------------------------------------------------------------------------------------------------------------------------------------------------------------------------------------------------------------------------------------------------------------------------------------------|
|    | concept word, protocol supplementary concept word, rare disease supplementary concept word, unique identifier, synonyms]                                                                                                                                                                                        |
| 22 | limit 21 to (english language and yr="2010 - 2020")                                                                                                                                                                                                                                                             |
| 23 | (Patient adj1 outcome*).mp. [mp=title, abstract, original title, name of substance word, subject heading word, floating sub-heading word, keyword heading word, organism supplementary concept word, protocol supplementary concept word, rare disease supplementary concept word, unique identifier, synonyms] |
| 24 | limit 23 to (english language and yr="2010 - 2020")                                                                                                                                                                                                                                                             |
| 25 | (Patient adj1 harm).mp. [mp=title, abstract, original title, name of substance word, subject heading word, floating sub-heading word, keyword heading word, organism supplementary concept word, protocol supplementary concept word, rare disease supplementary concept word, unique identifier, synonyms]     |
| 26 | limit 25 to (english language and yr="2010 - 2020")                                                                                                                                                                                                                                                             |
| 27 | exp Risk Management/                                                                                                                                                                                                                                                                                            |
| 28 | limit 27 to (english language and yr="2010 - 2020")                                                                                                                                                                                                                                                             |
| 29 | 2 or 4 or 6 or 8 or 10 or 12                                                                                                                                                                                                                                                                                    |
| 30 | 14 or 16                                                                                                                                                                                                                                                                                                        |
| 31 | 18 or 20 or 22 or 24 or 26 or 28                                                                                                                                                                                                                                                                                |
| 32 | 29 and 30 and 31                                                                                                                                                                                                                                                                                                |
